# Supplementary material for: DMSO as a dual carbon synthon in one-pot tandem synthesis of N-alkylated quinazolinones from anthranilamides and acetophenones
Source: Royal Society of Chemistry journal article supplement (doi:10.1039/d2nj01428a), 2022-01-01

# DMSO as a Dual Carbon Synthone in One-pot Tandem Synthesis of *N*-alkylated Quinazolinones from Anthranilamides and Acetophenones

Pushpendra Yadav,<sup>†,‡</sup> Sourabh Yadav,<sup>†,‡</sup> Annapurna Awasthi,<sup>†,‡</sup> Mandalparthi Phanindrudu,<sup>§</sup>  
Suman Bhowmick,<sup>†</sup> and Dharmendra Kumar Tiwari,<sup>\* †</sup>

<sup>†</sup> Department of Biological and Synthetic Chemistry, Center of Biomedical Research, Sanjay Gandhi Post-Graduate Institute of Medical Sciences Campus, Raebareli Road, Lucknow-226014, Uttar Pradesh, India.

<sup>‡</sup> Department of Chemistry, Institute of Science, Banaras Hindu University, 221005 Varanasi, Uttar Pradesh, India.

<sup>§</sup> Division of Organic Synthesis and Process Chemistry, CSIR-Indian Institute of Chemical Technology, Hyderabad 500007, India.

## Table of Contents

|   |                                                                        |             |
|---|------------------------------------------------------------------------|-------------|
| 1 | <b>General Information</b>                                             | <b>Page</b> |
| 2 | Soft copies of <sup>1</sup> H and <sup>13</sup> C NMR of all compounds | 2 - 26      |

$^1\text{H}$  and  $^{13}\text{C}$  NMR spectra of **3aa** in  $\text{CDCl}_3$  at 400 MHz

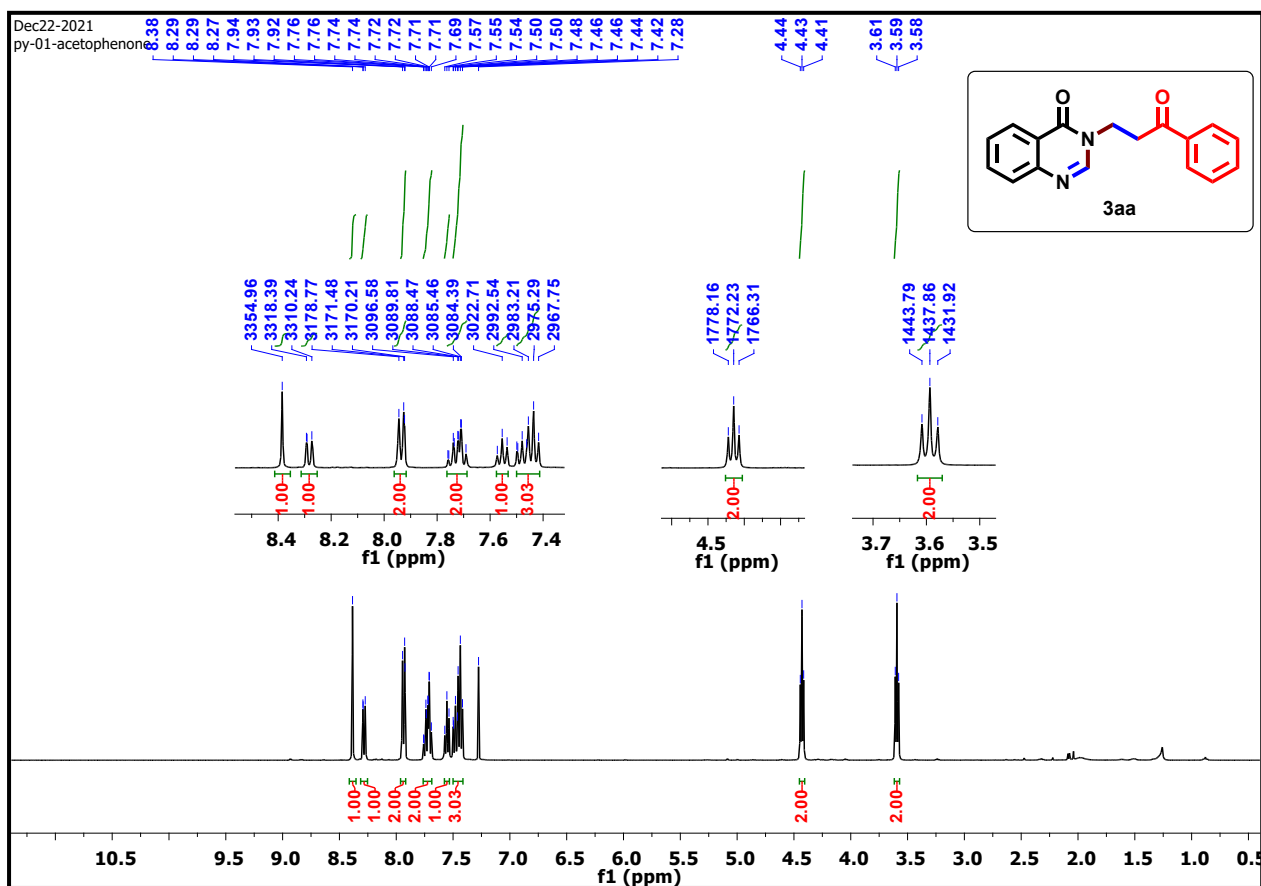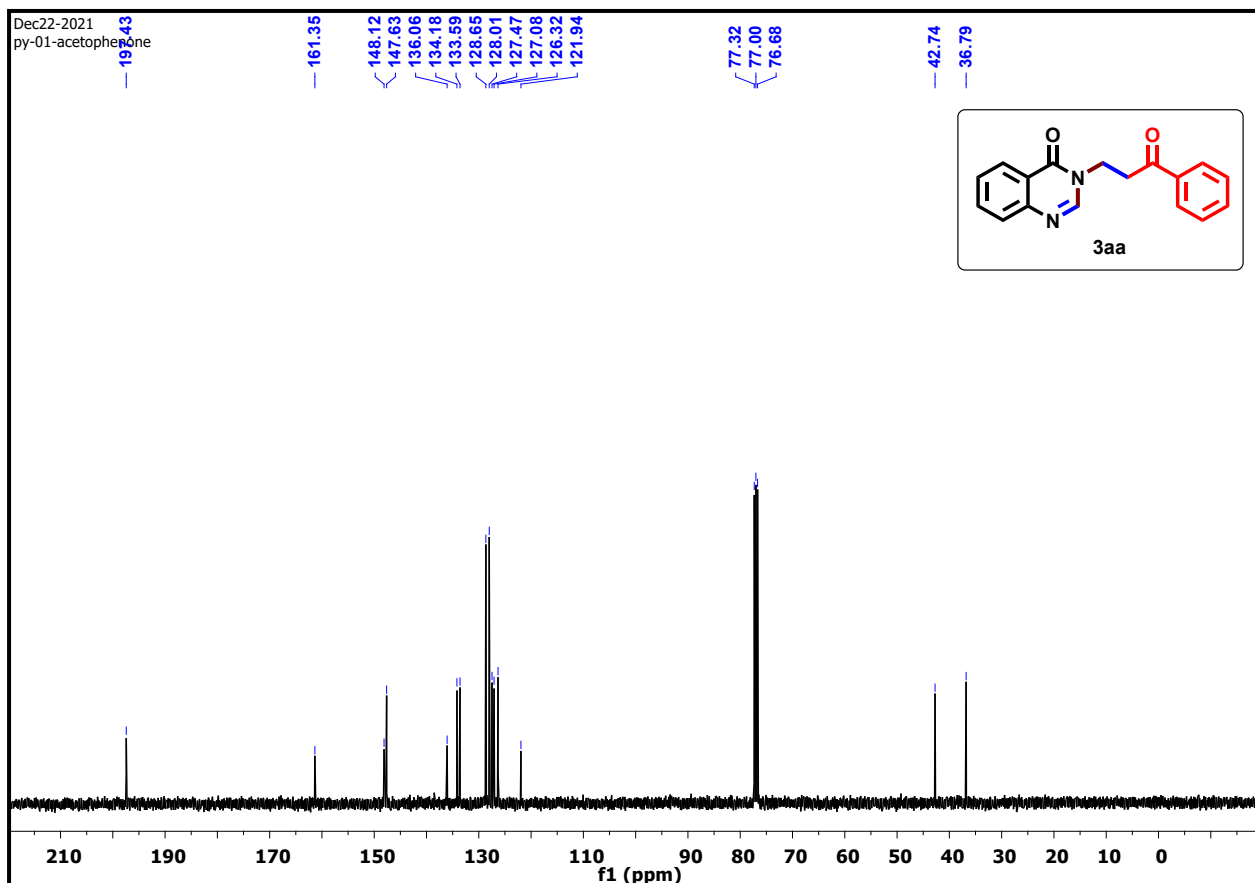

$^1\text{H}$  and  $^{13}\text{C}$  NMR spectra of **3ab** in  $\text{CDCl}_3$  at 400 MHz

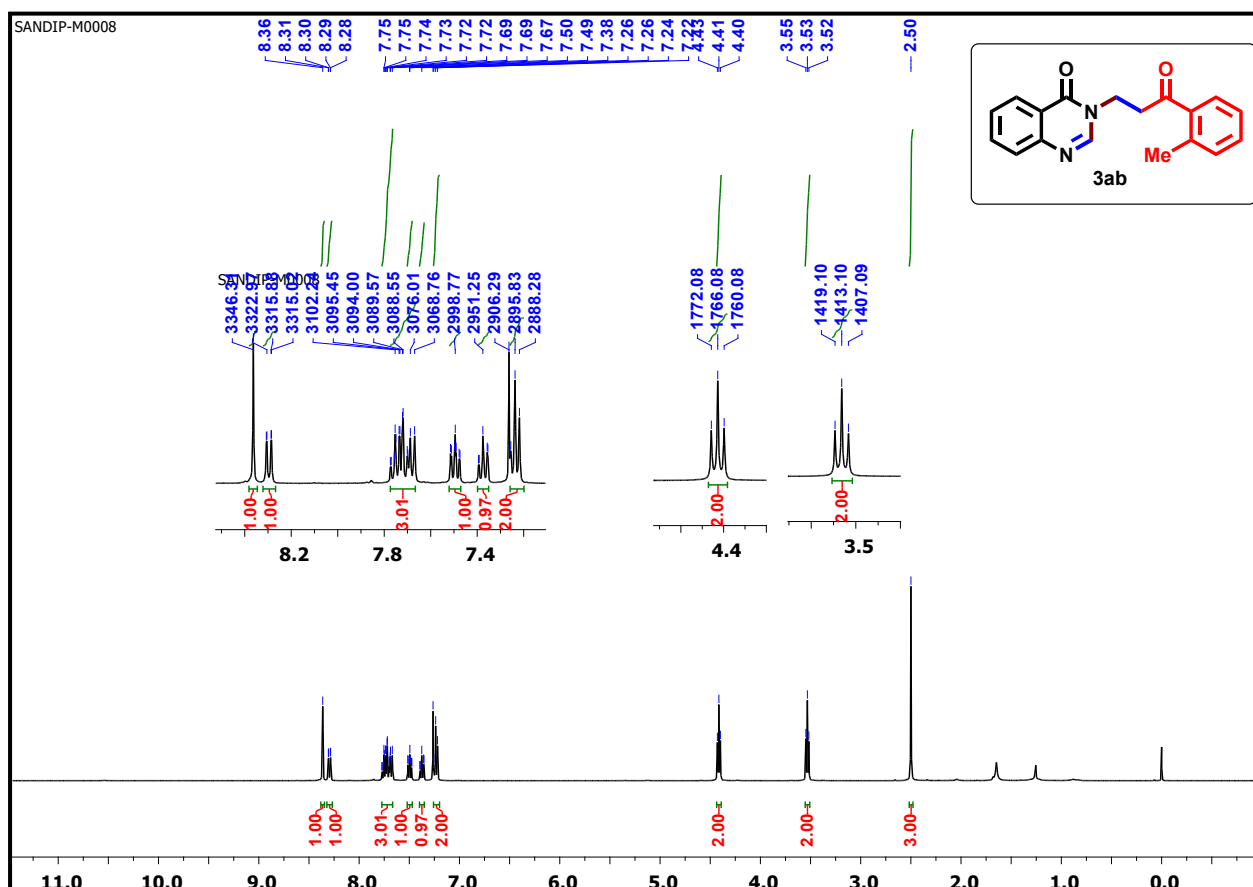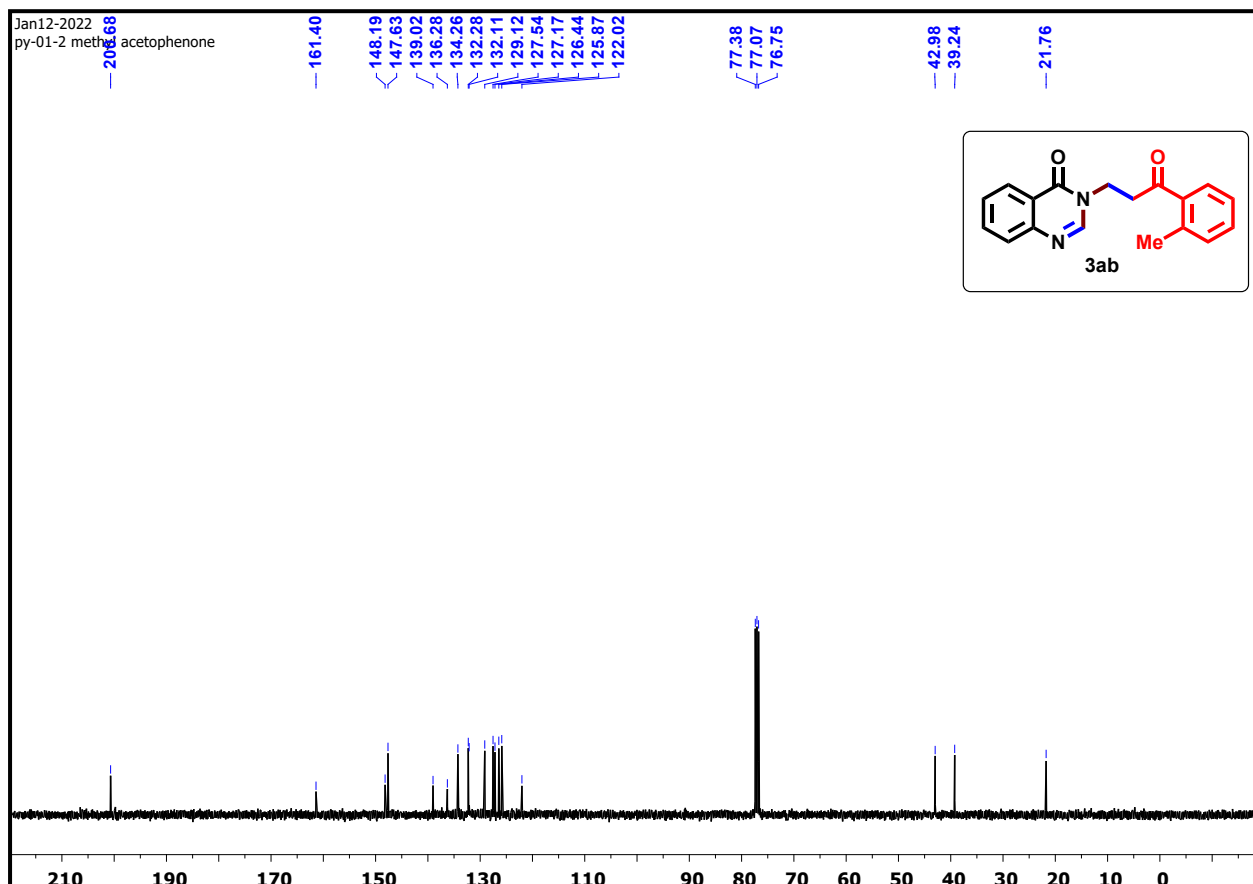

$^1\text{H}$  and  $^{13}\text{C}$  NMR spectra of **3ac** in  $\text{CDCl}_3$  at 400 MHz

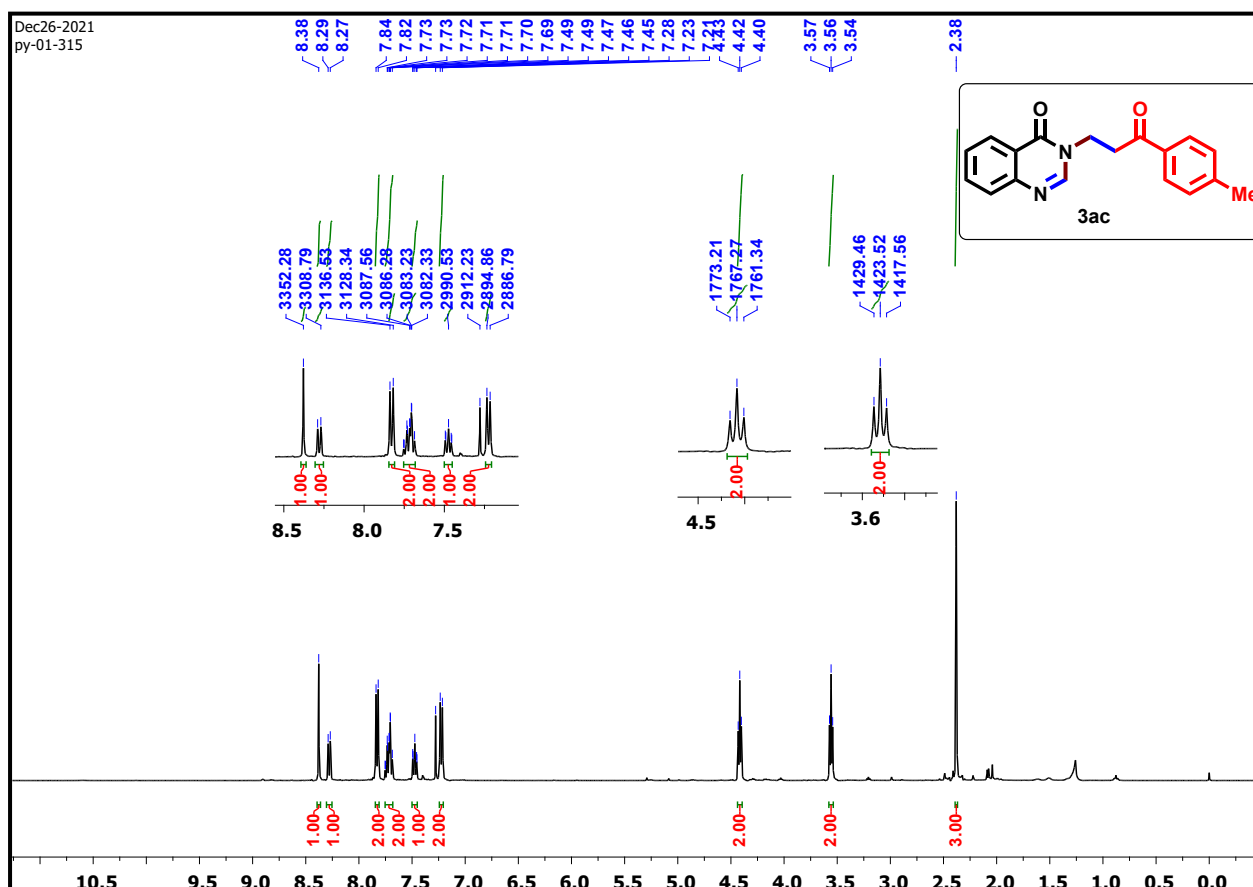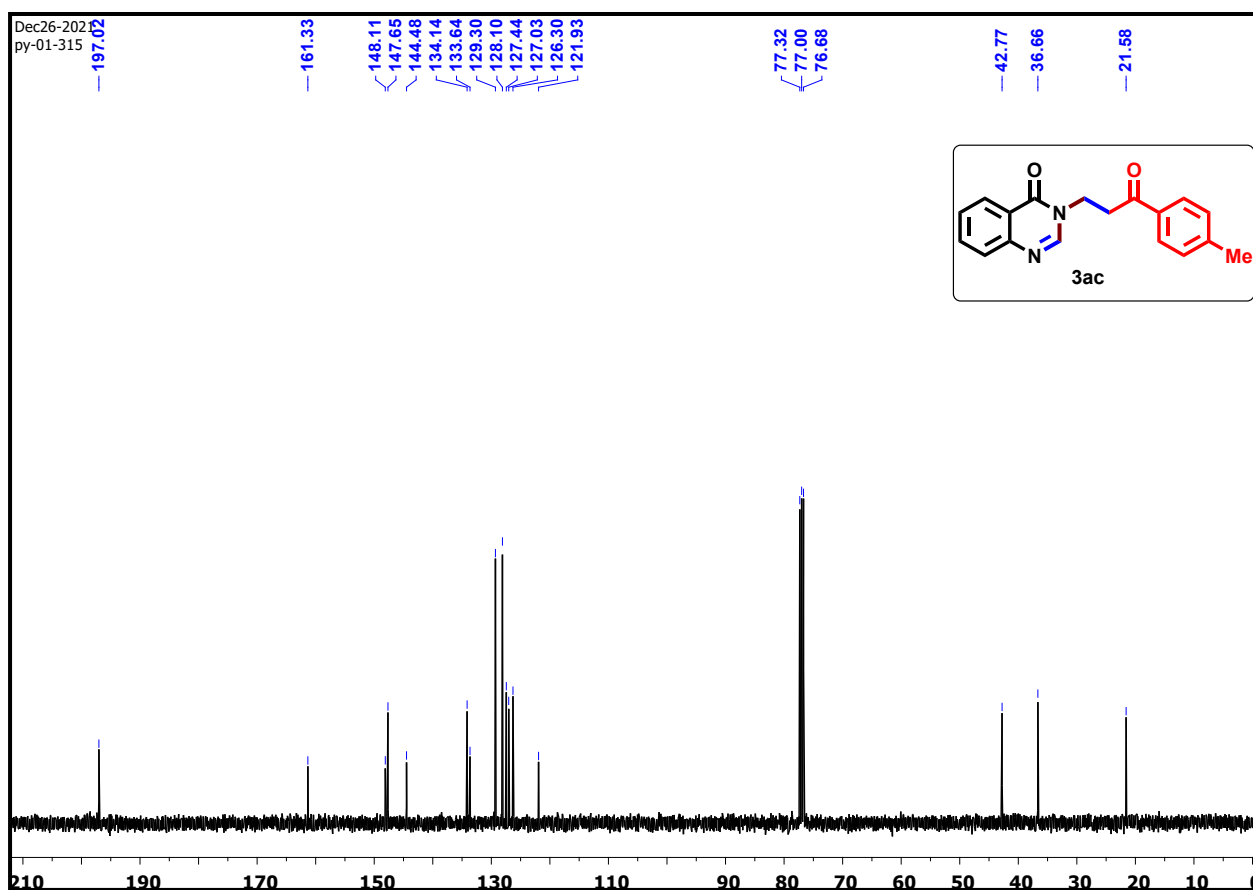

$^1\text{H}$  and  $^{13}\text{C}$  NMR spectra of **3ad** in  $\text{CDCl}_3$  at 400 MHz

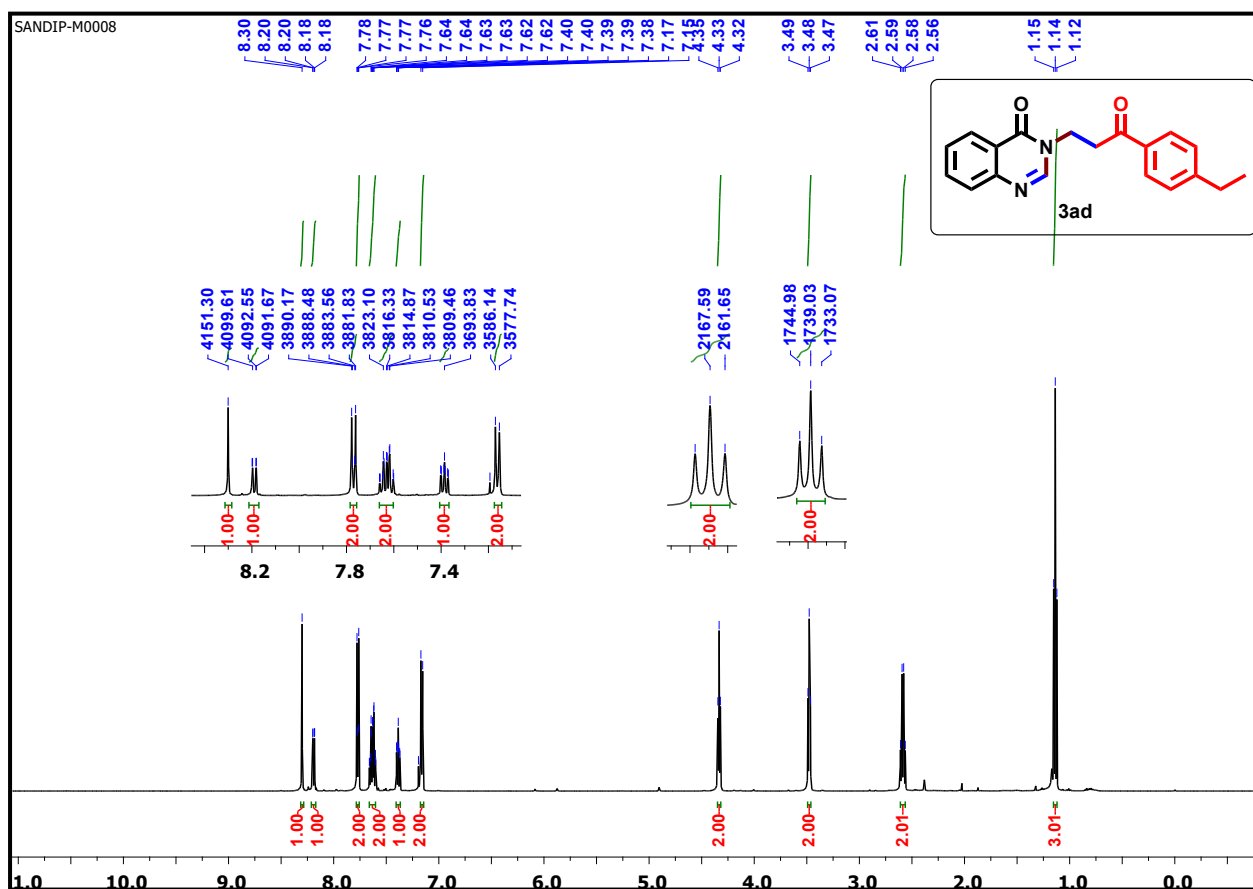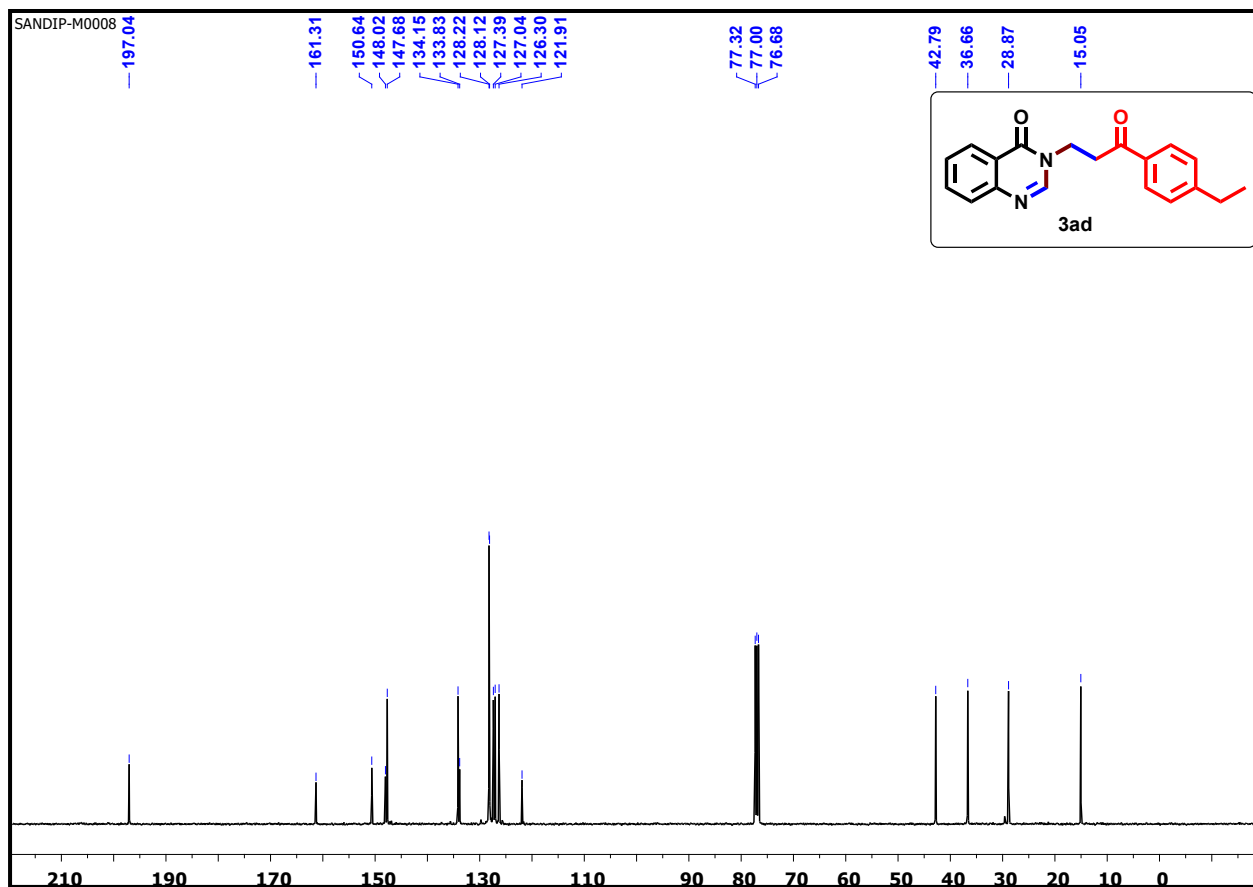

$^1\text{H}$  and  $^{13}\text{C}$  NMR spectra of **3ae** in  $\text{CDCl}_3$  at 400 MHz

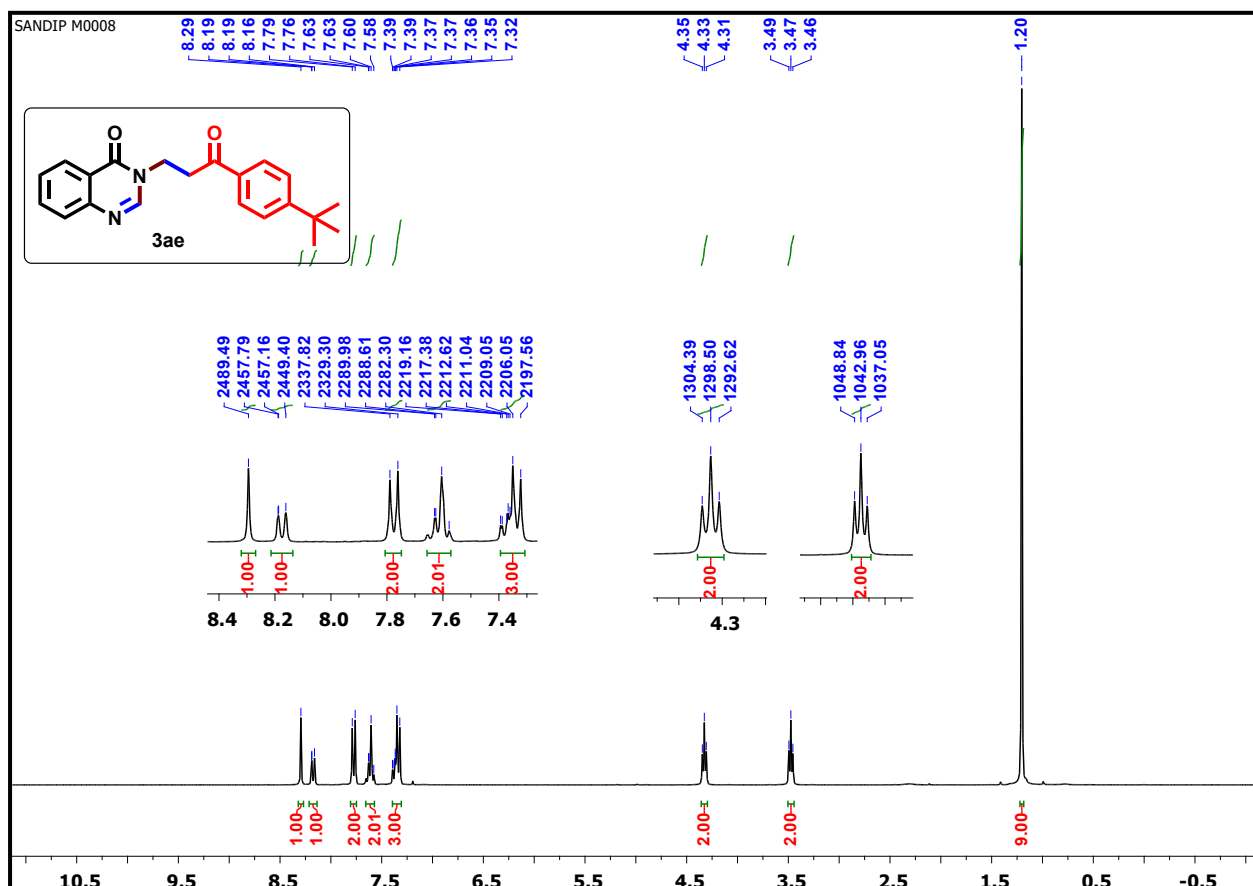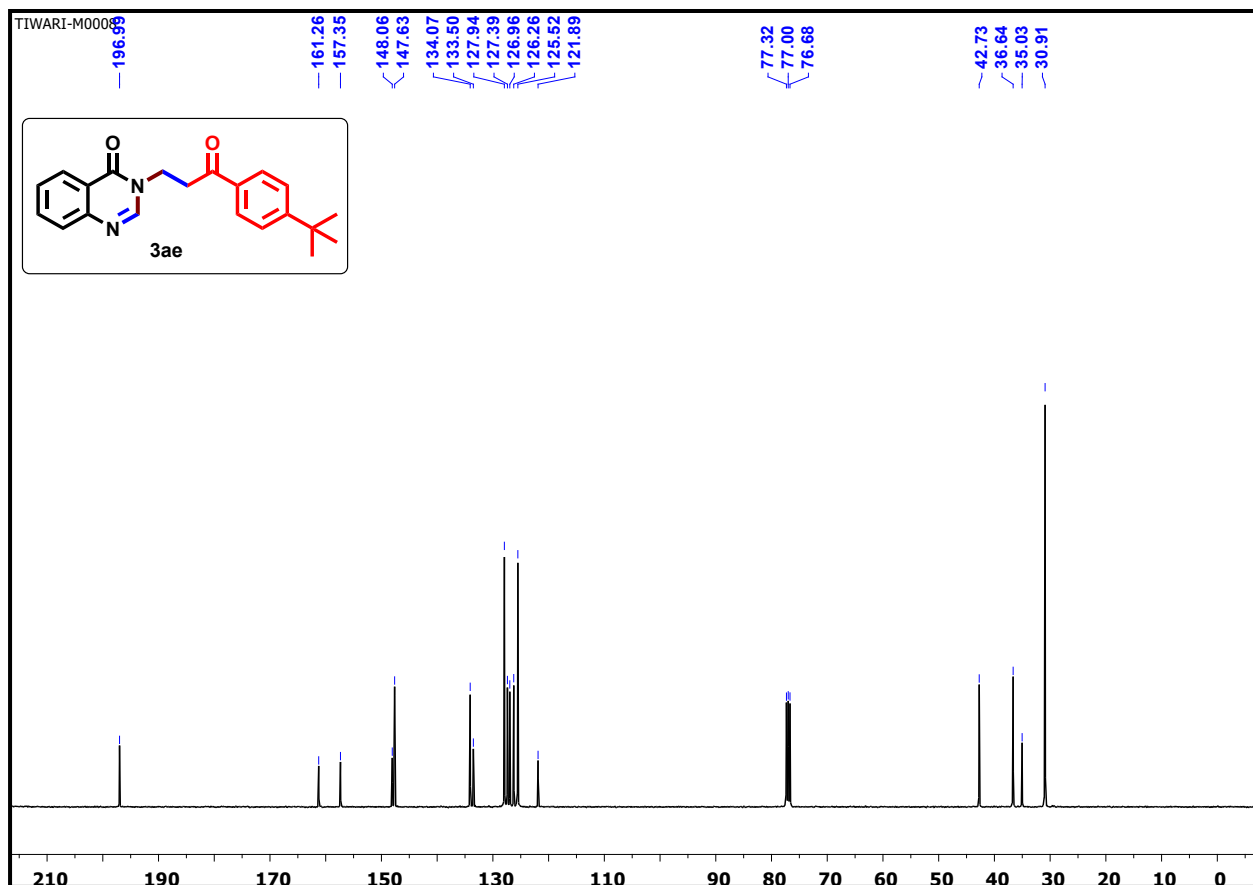

$^1\text{H}$  and  $^{13}\text{C}$  NMR spectra of **3af** in  $\text{CDCl}_3$  at 400 MHz

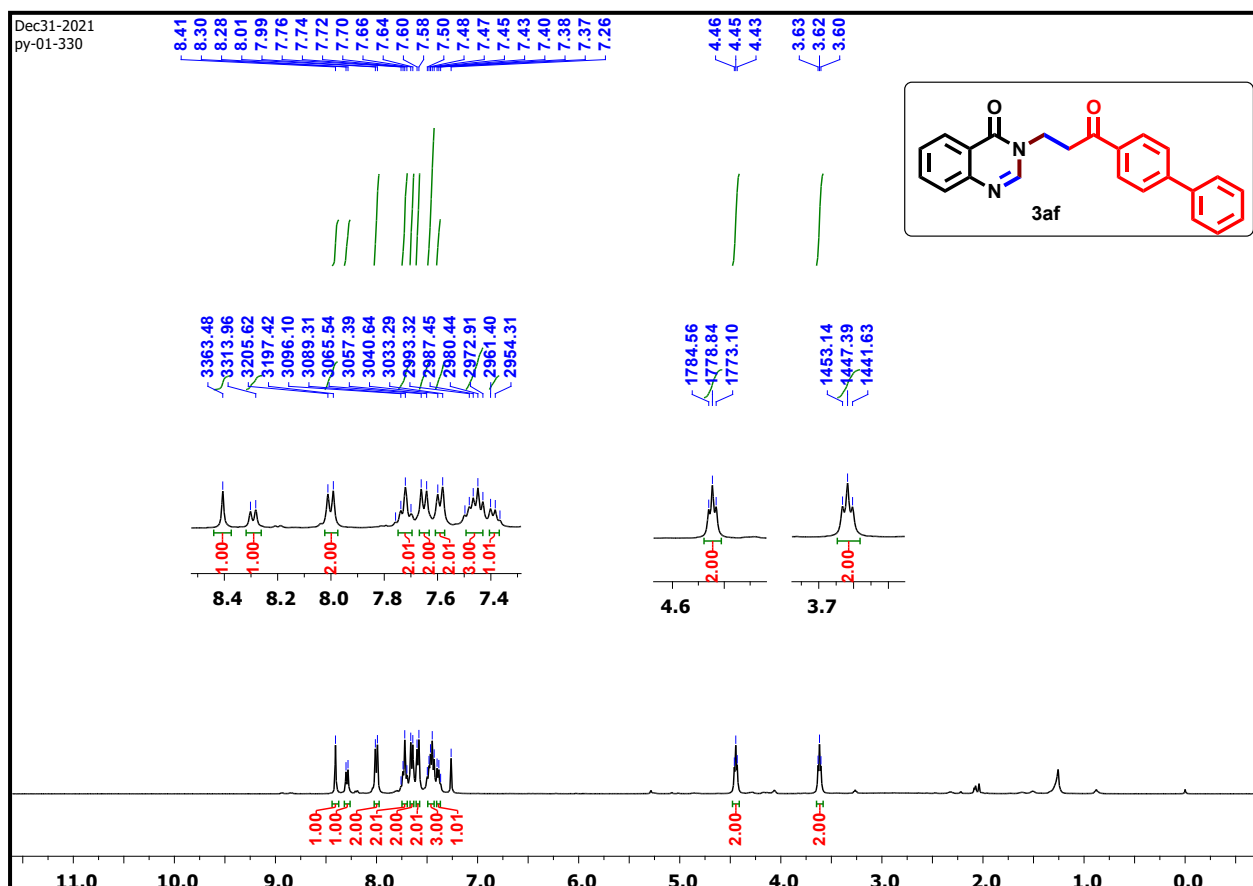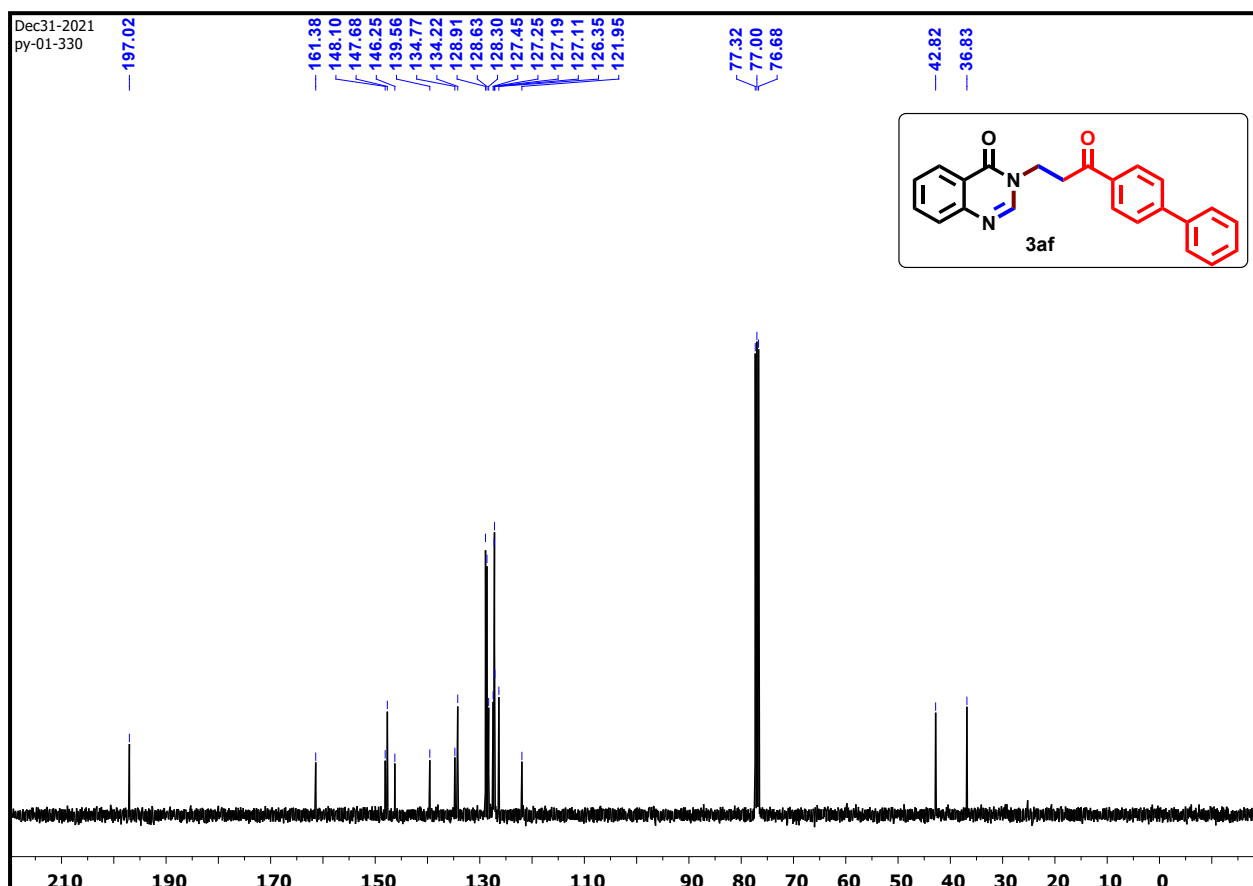

$^1\text{H}$  and  $^{13}\text{C}$  NMR spectra of **3ag** in  $\text{CDCl}_3$  at 400 MHz

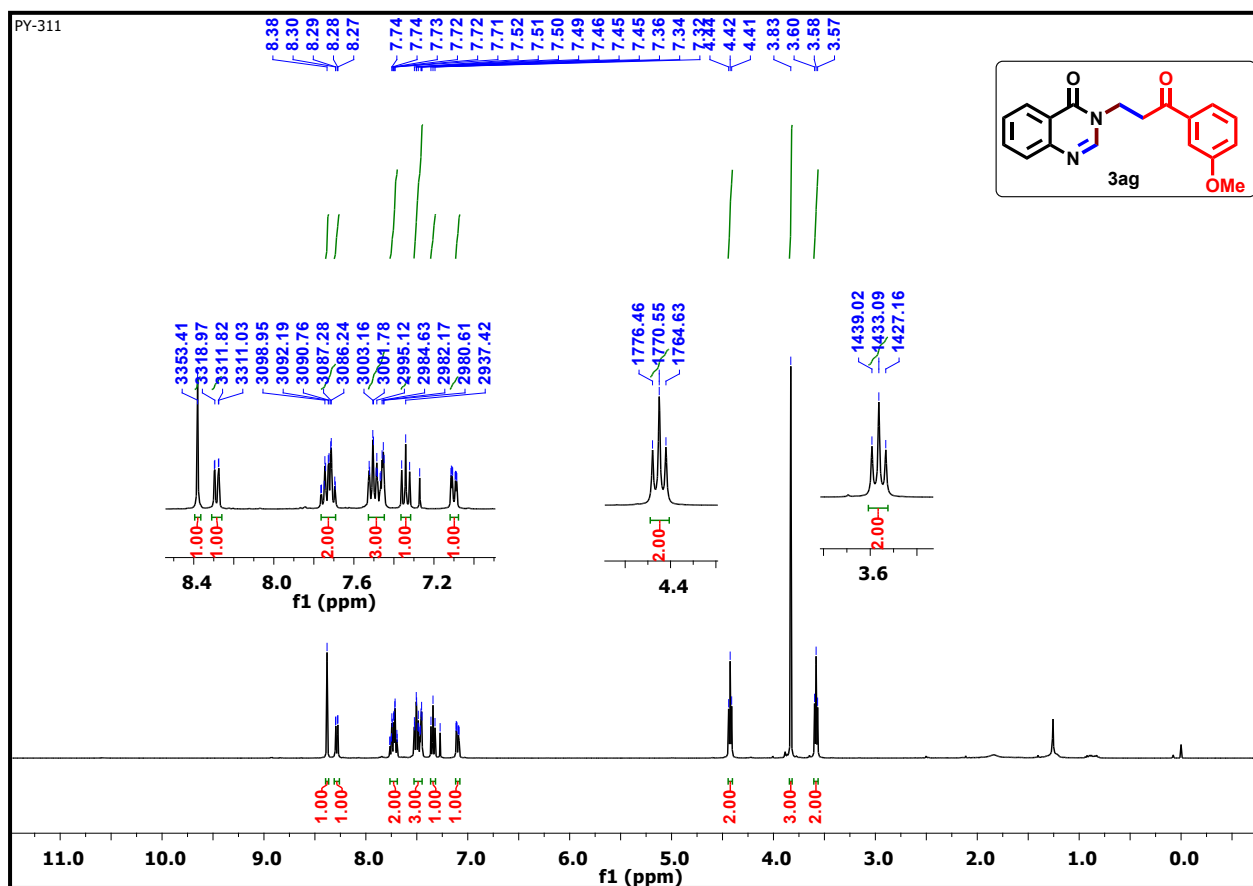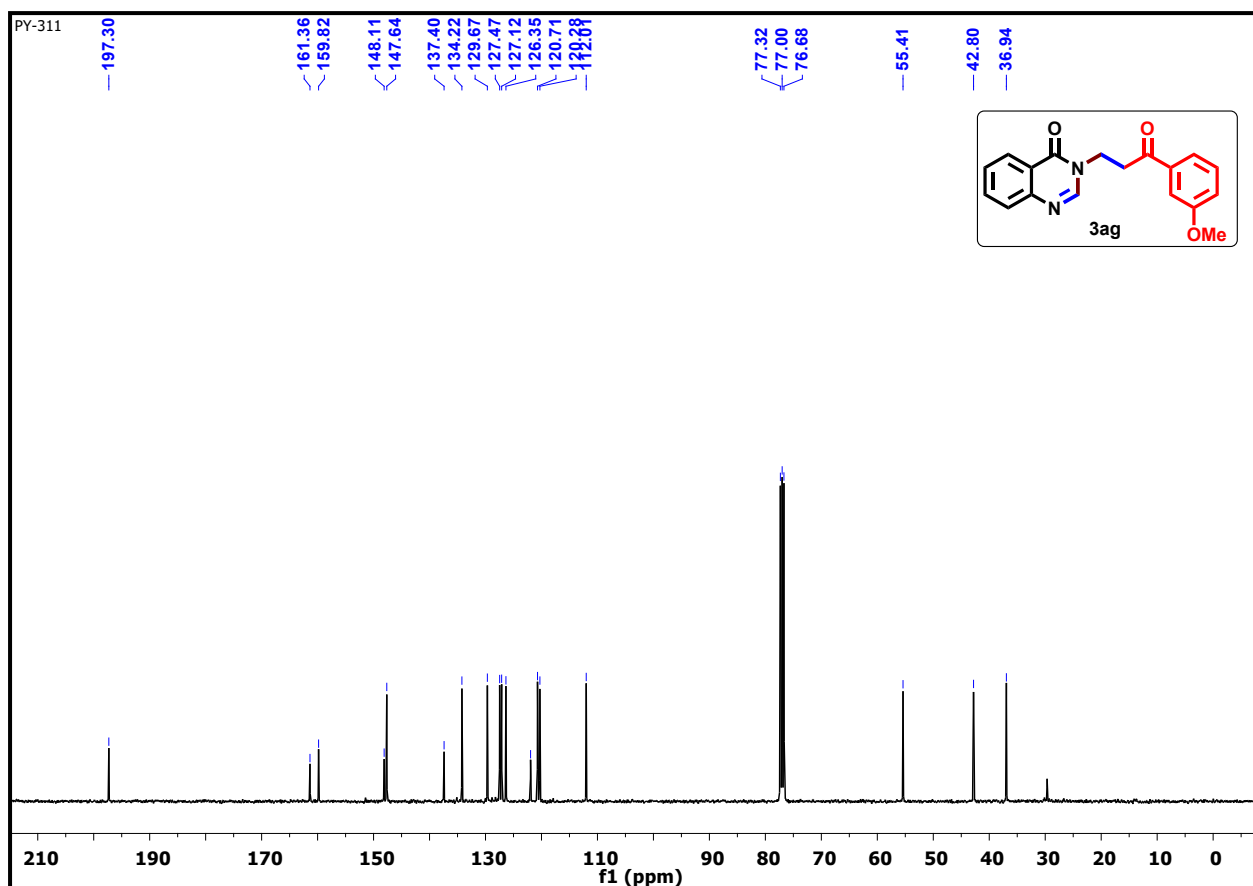



$^1\text{H}$  and  $^{13}\text{C}$  NMR spectra of **3ah** in  $\text{CDCl}_3$  at 400 MHz

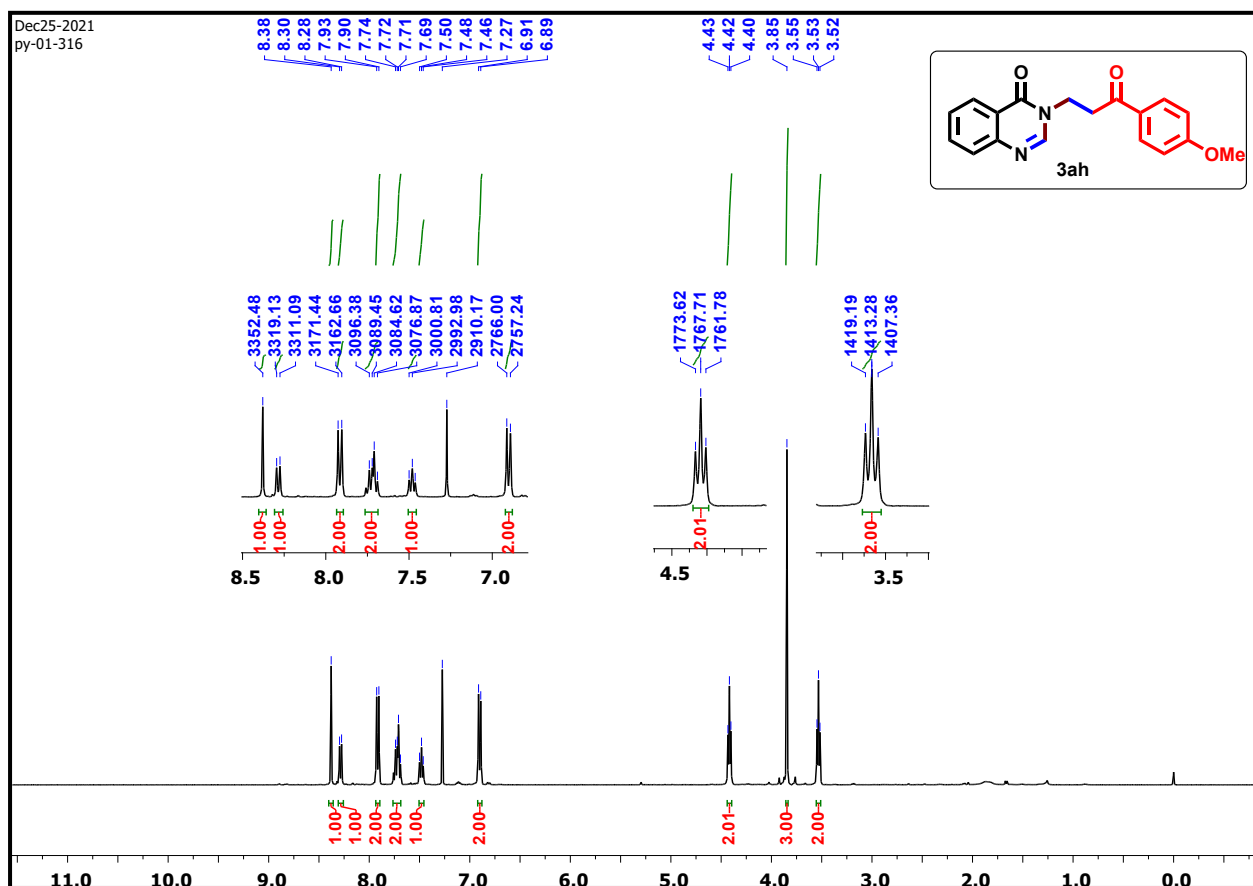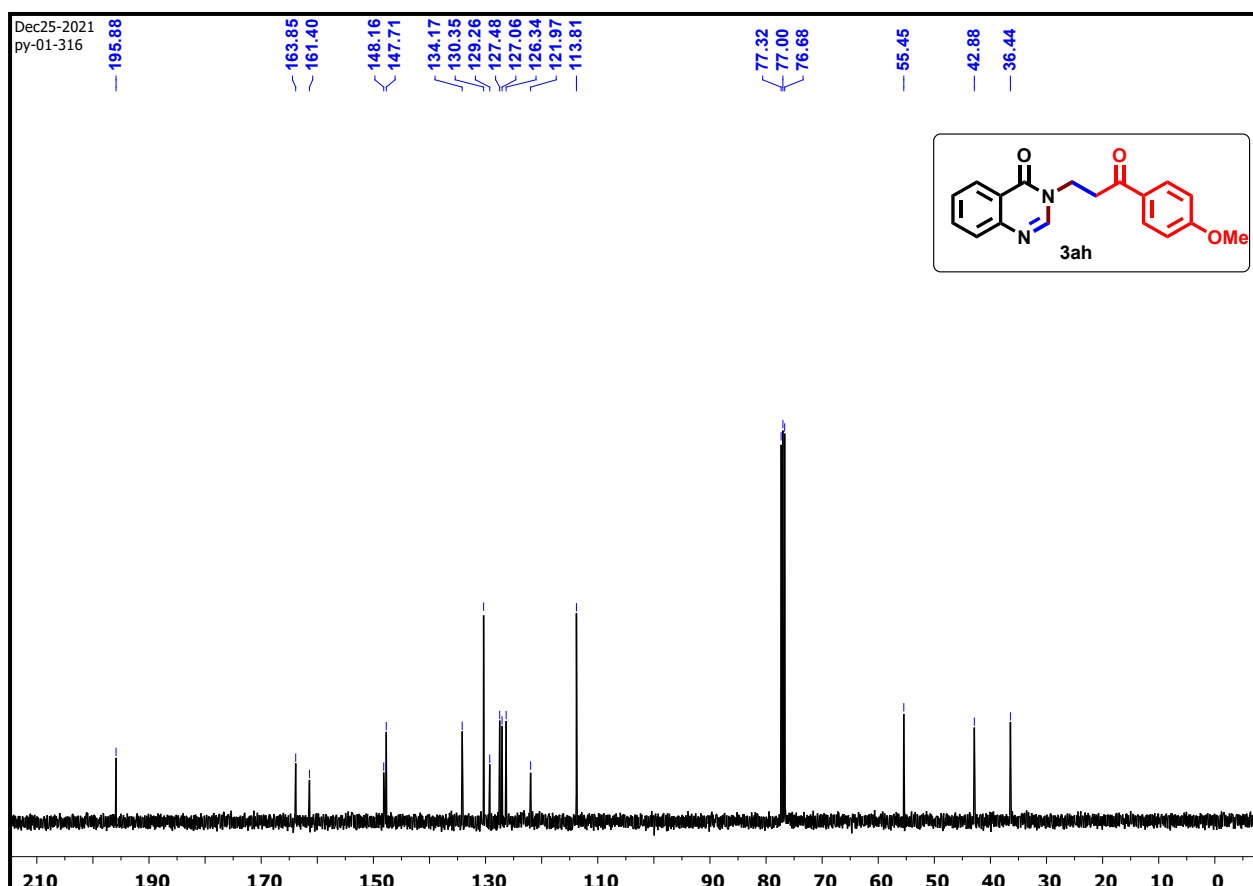

<sup>1</sup>H and <sup>13</sup>C NMR spectra of **3ai** in CDCl<sub>3</sub> at 400 MHz

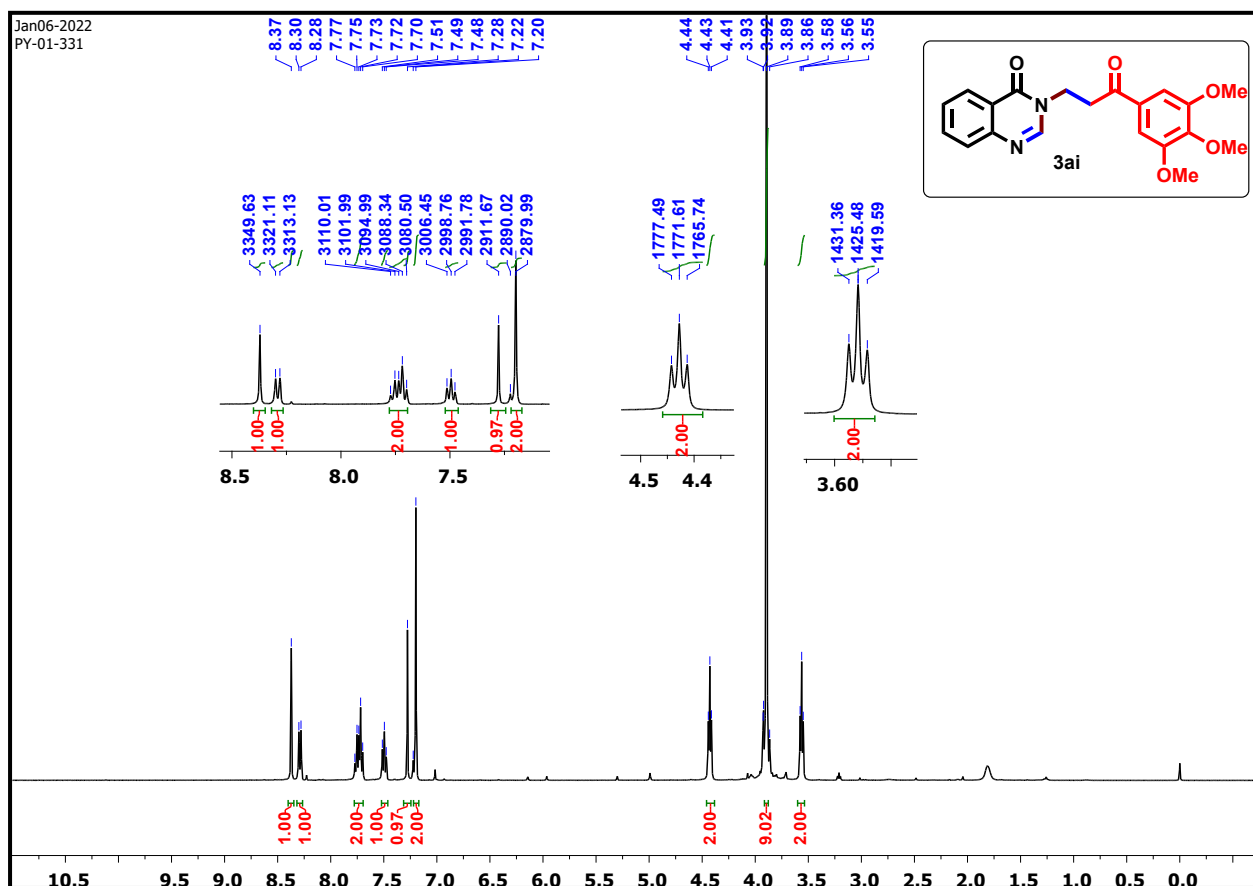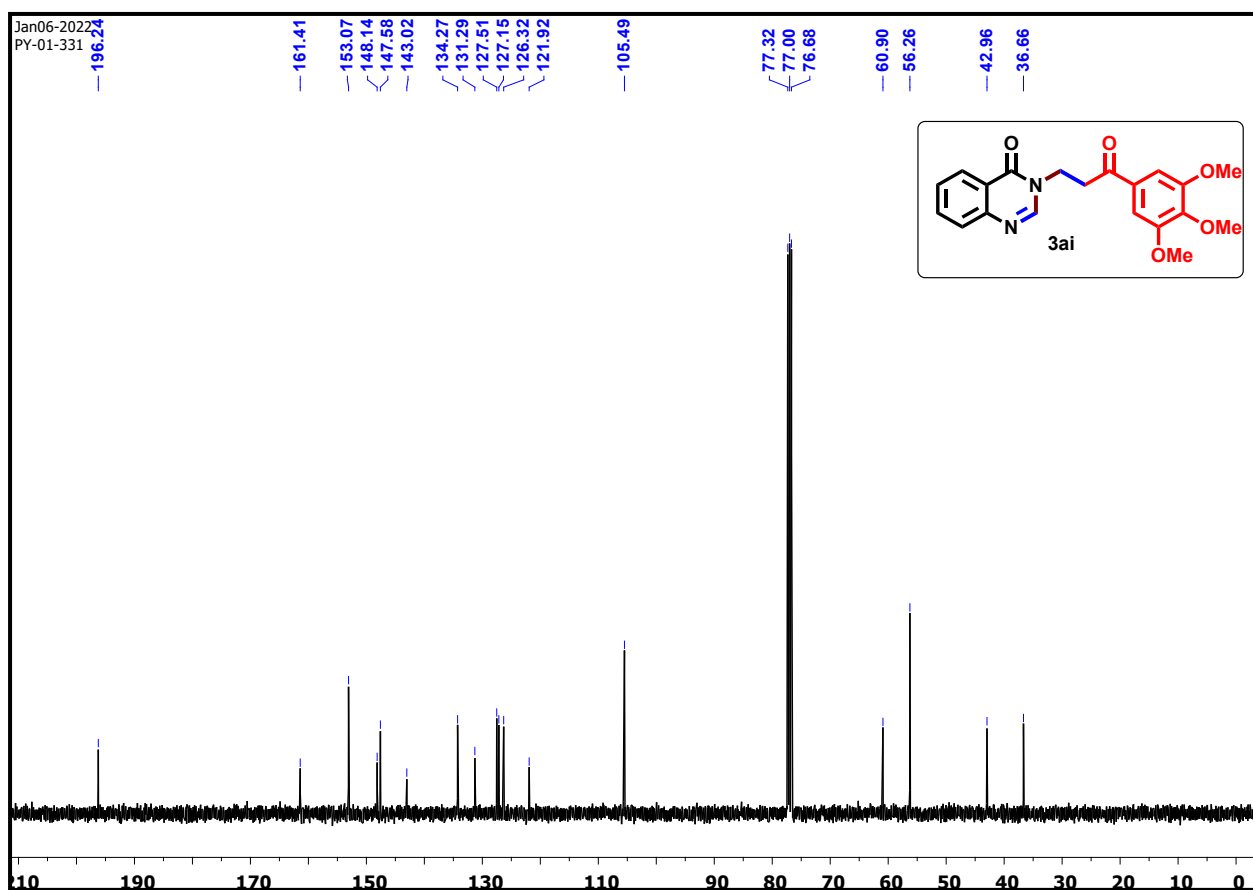

$^1\text{H}$  and  $^{13}\text{C}$  NMR spectra of **3aj** in  $\text{CDCl}_3$  at 400 MHz

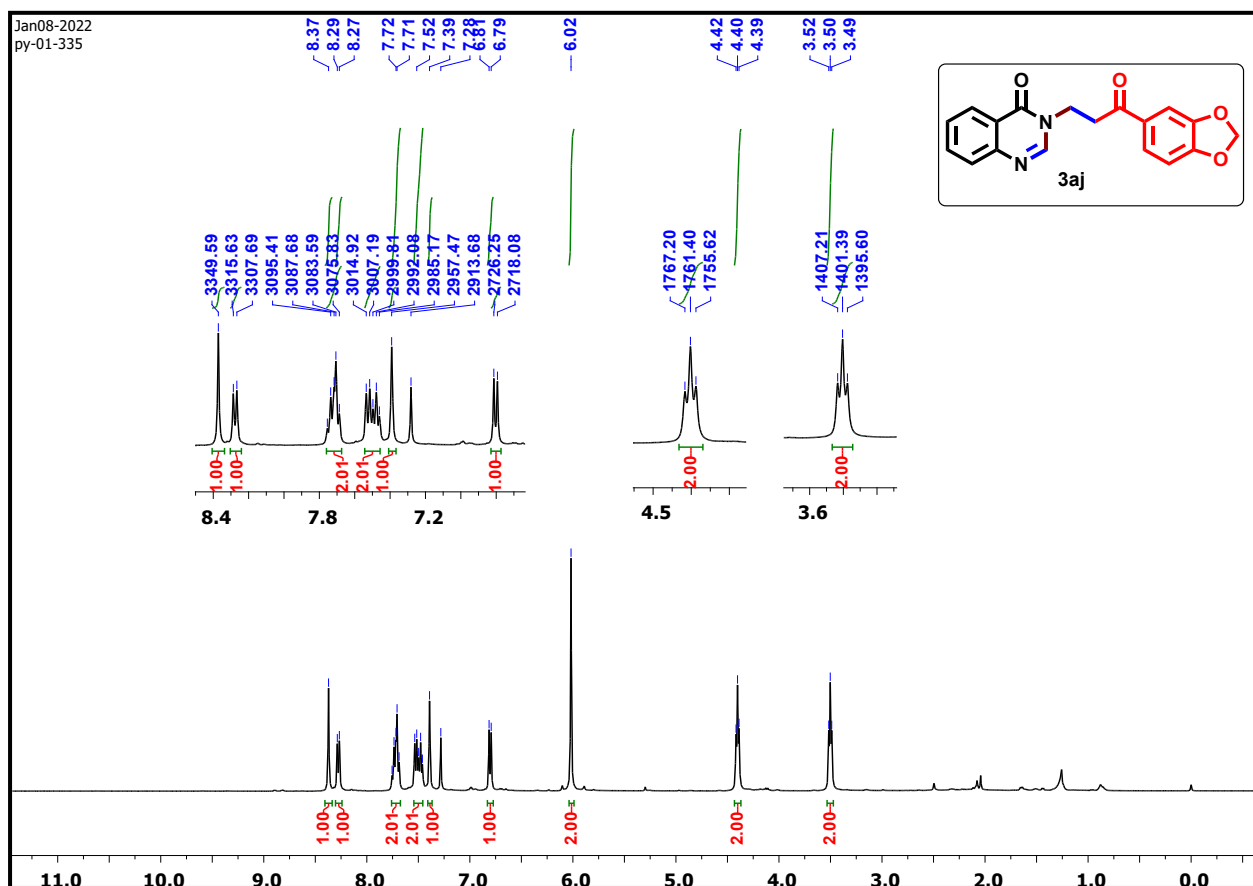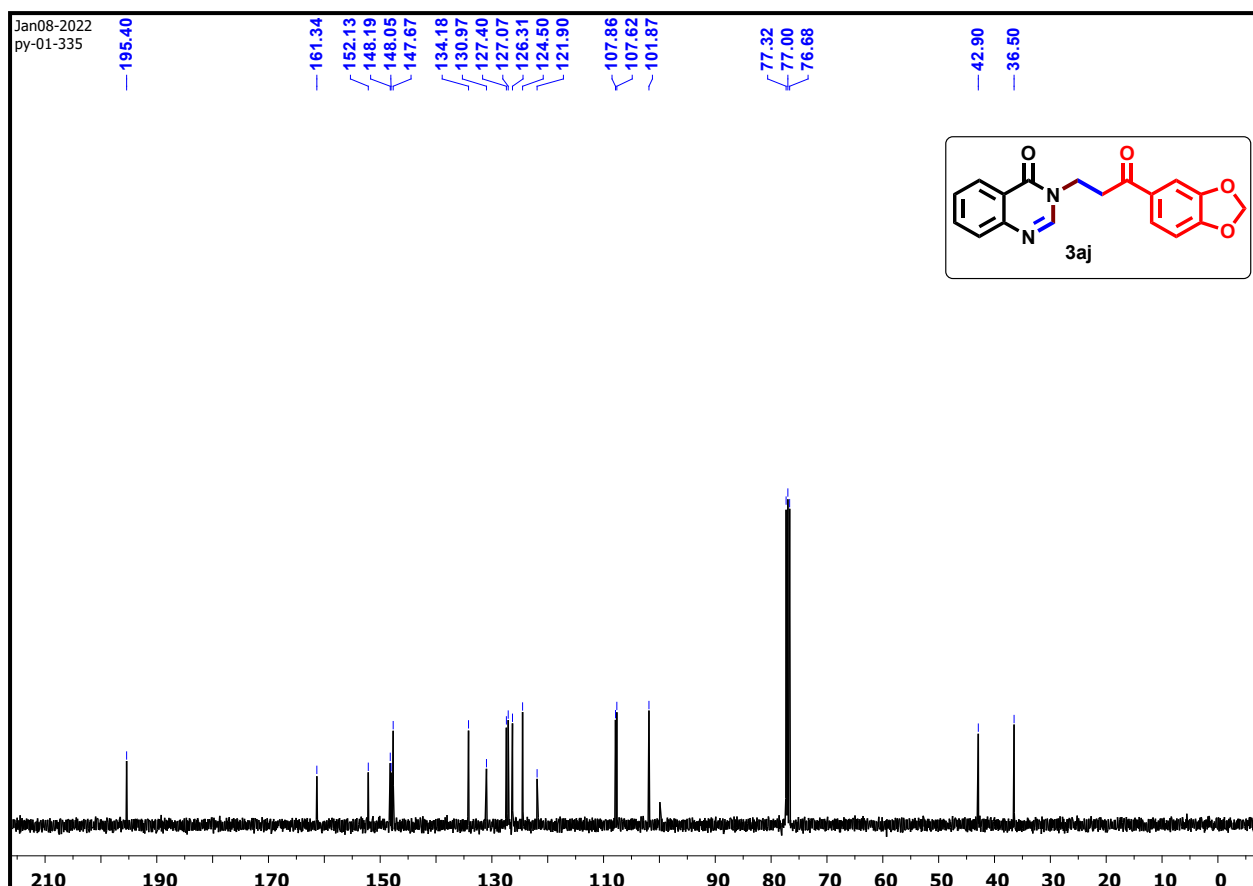

$^1\text{H}$  and  $^{13}\text{C}$  NMR spectra of **3ak** in  $\text{DMSO-d}_6$  at 400 MHz

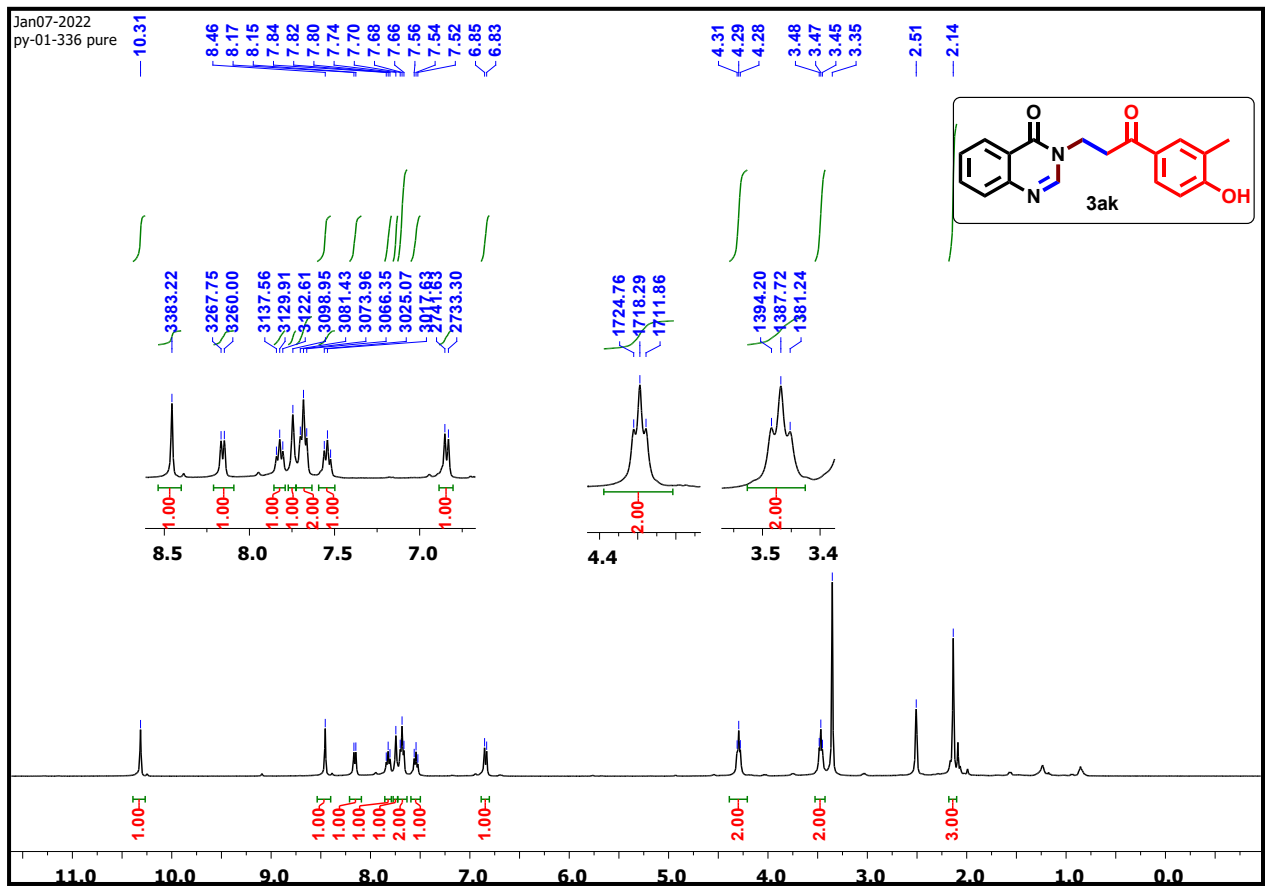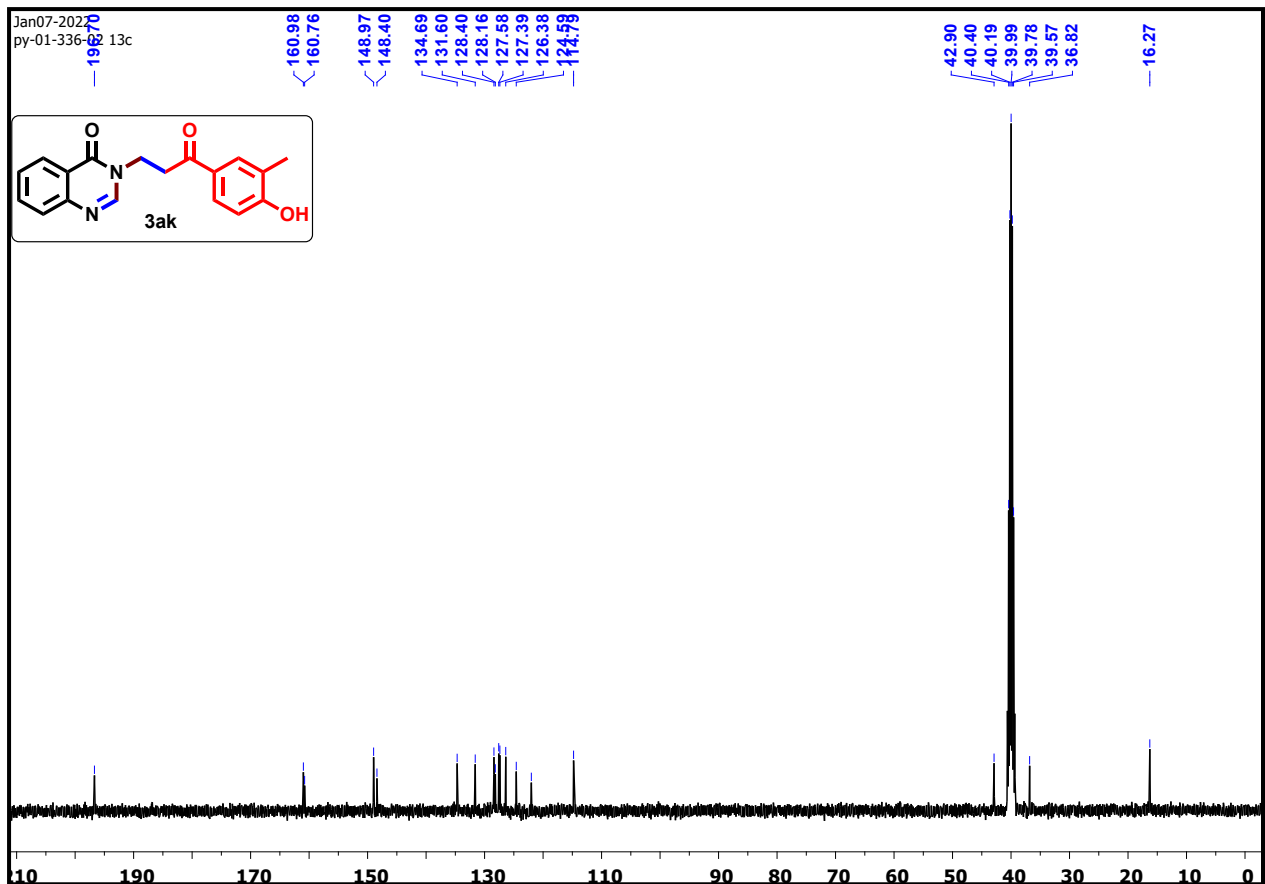

$^1\text{H}$  and  $^{13}\text{C}$  NMR spectra of **3al** in  $\text{CDCl}_3$  400 MHz

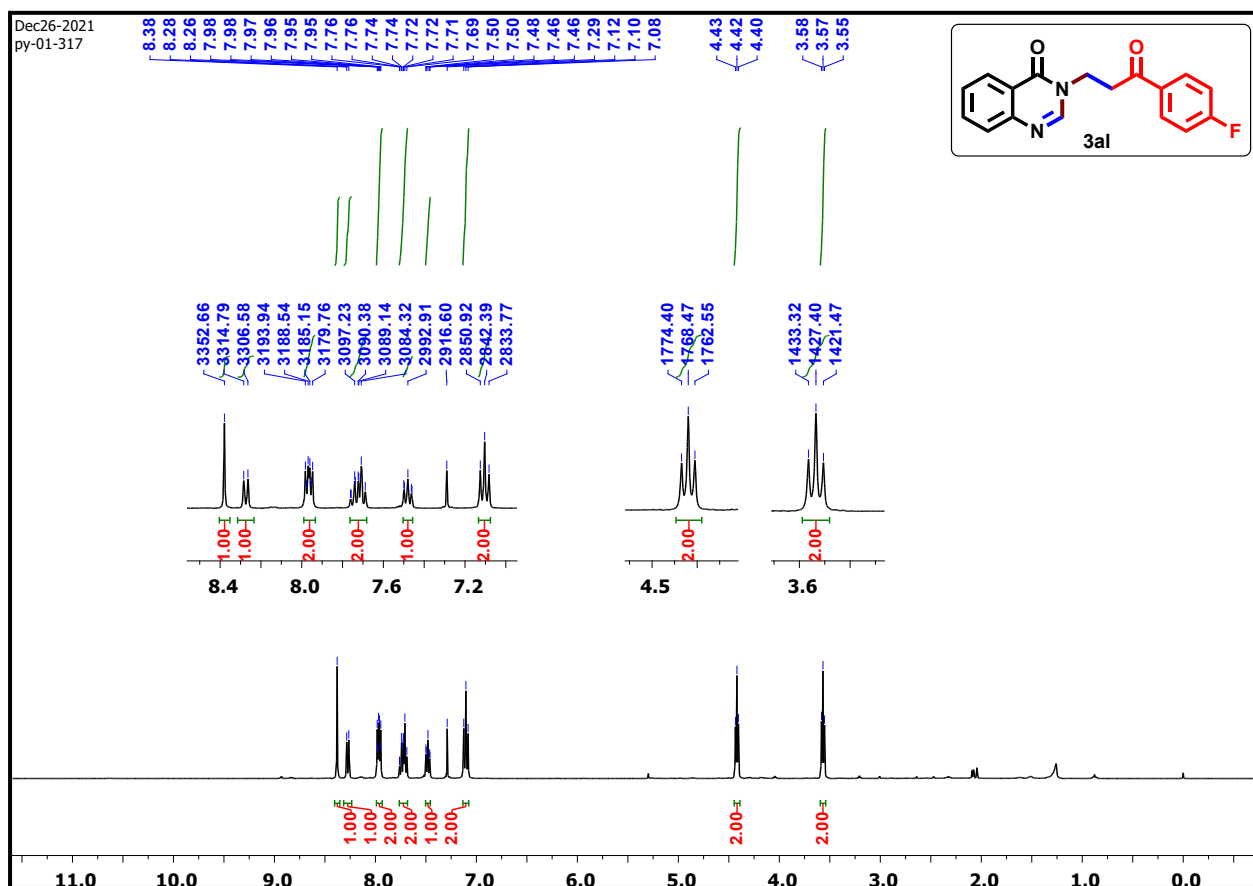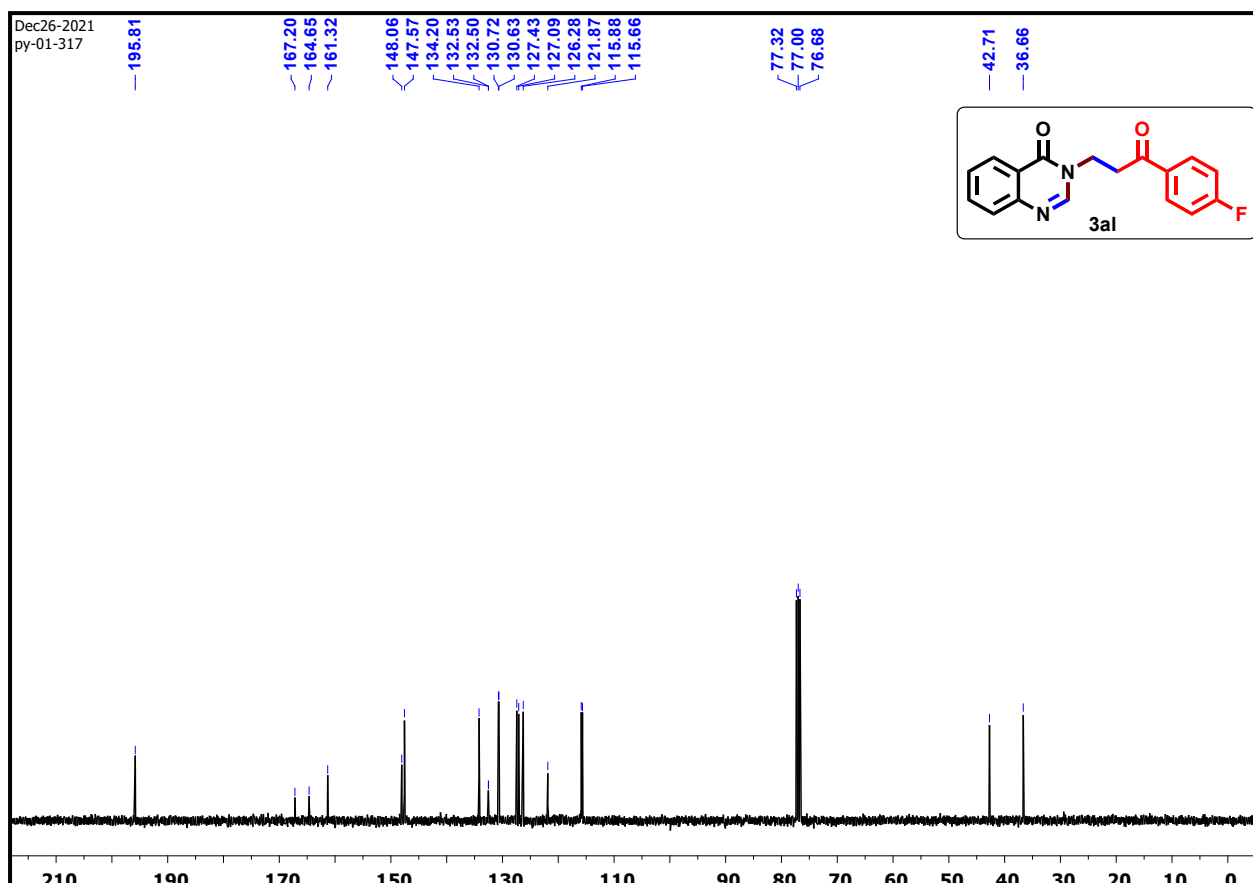

<sup>19</sup>F NMR spectra of **3al** in CDCl<sub>3</sub> 400 MHz (with reference to internal standard  $\alpha, \alpha, \alpha$ -trifluorotoluene)

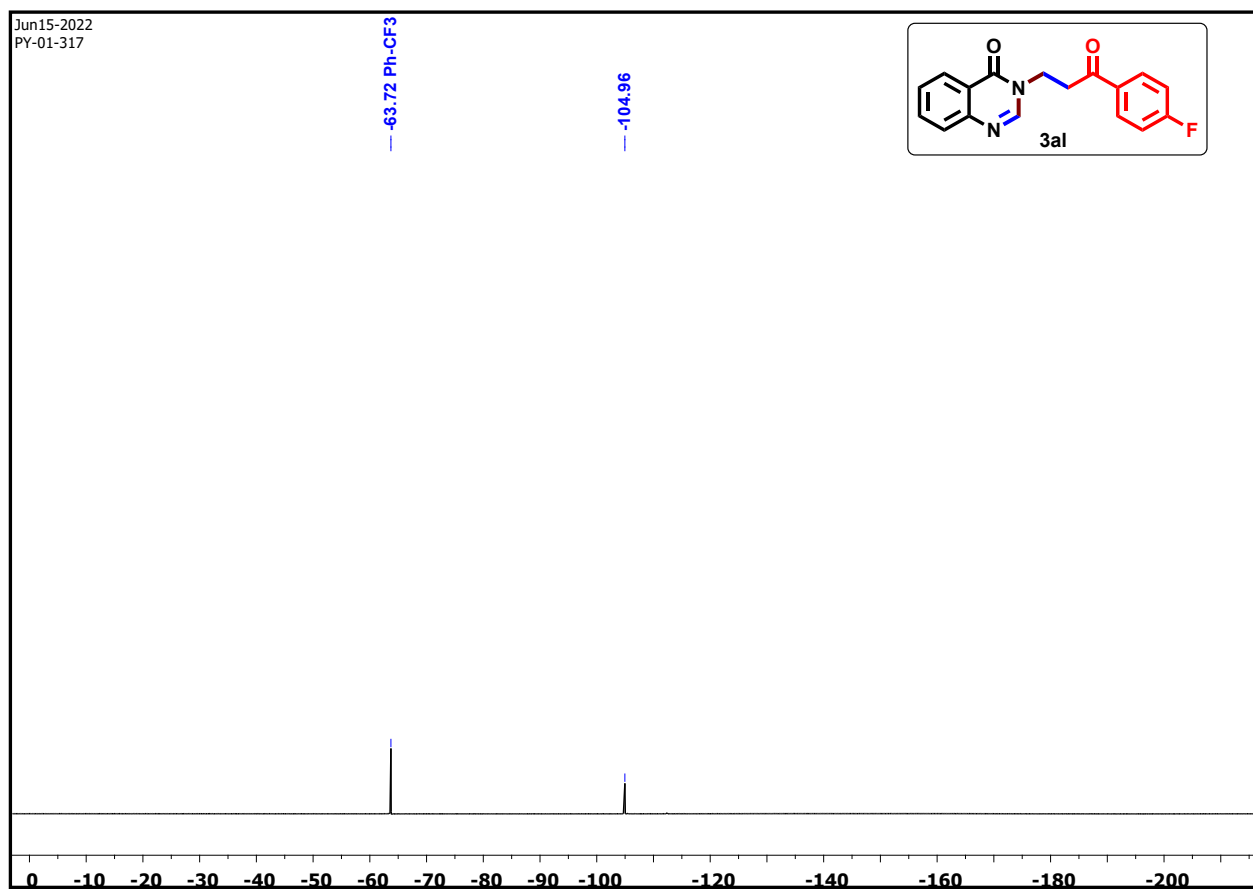

$^1\text{H}$  and  $^{13}\text{C}$  NMR spectra of **3am** in  $\text{CDCl}_3$ , 400 MHz

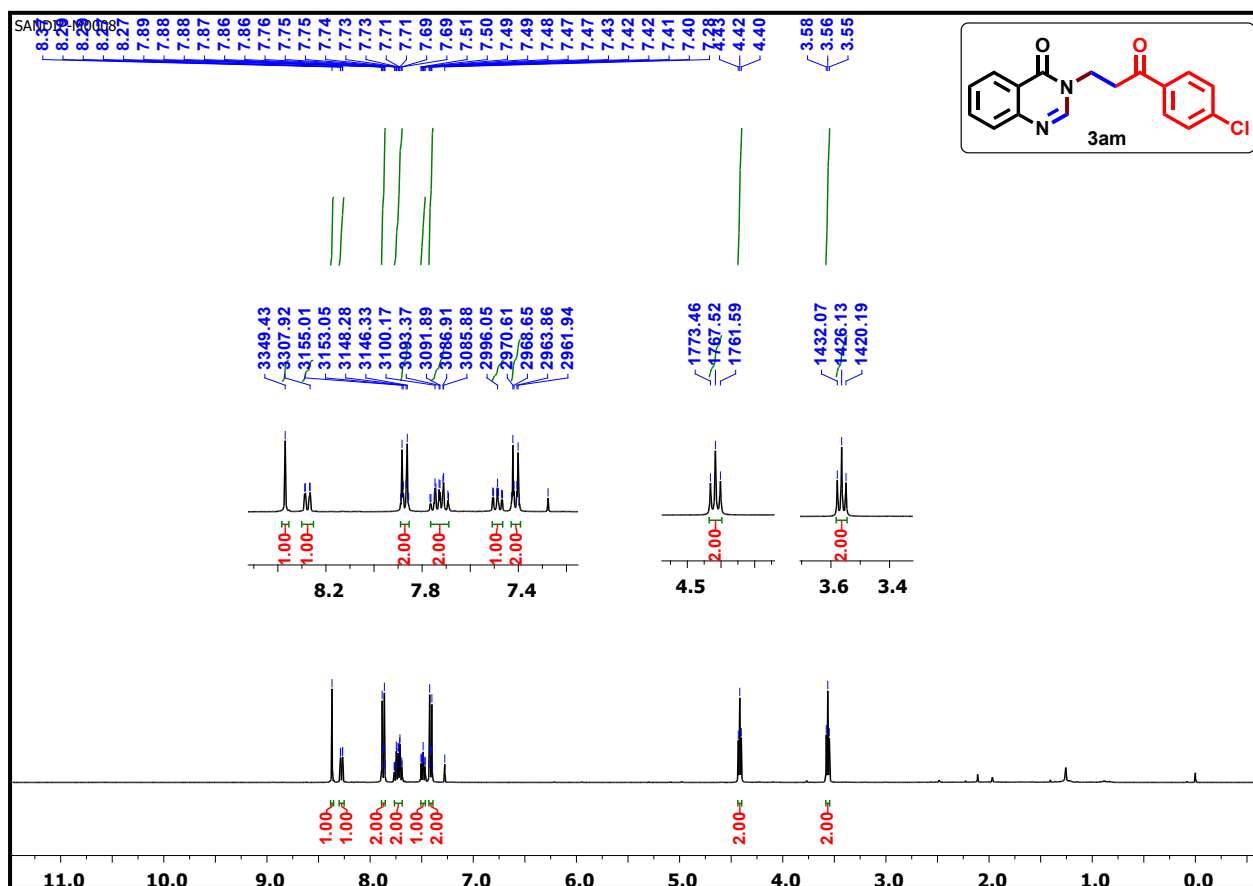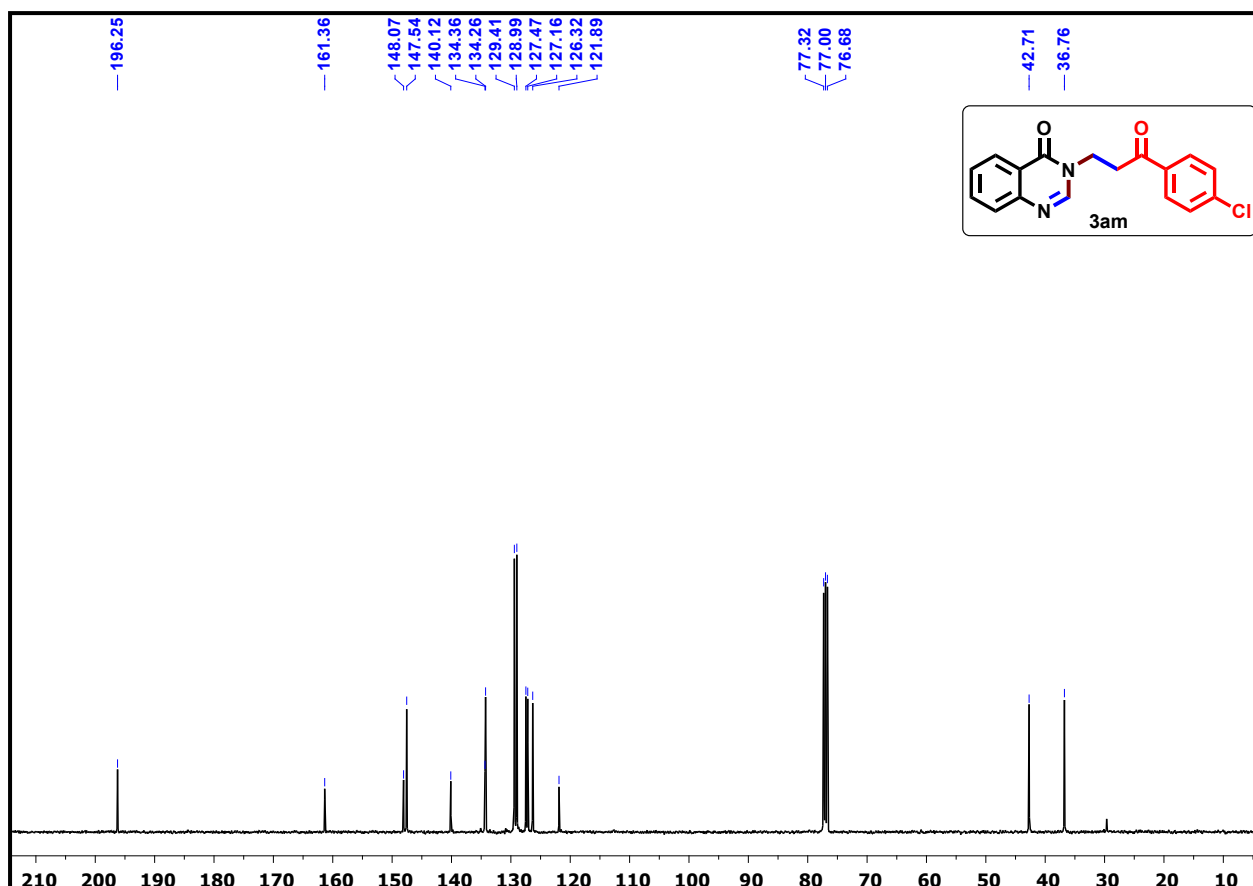

$^1\text{H}$  and  $^{13}\text{C}$  NMR spectra of **3an** in  $\text{CDCl}_3$  400 MHz

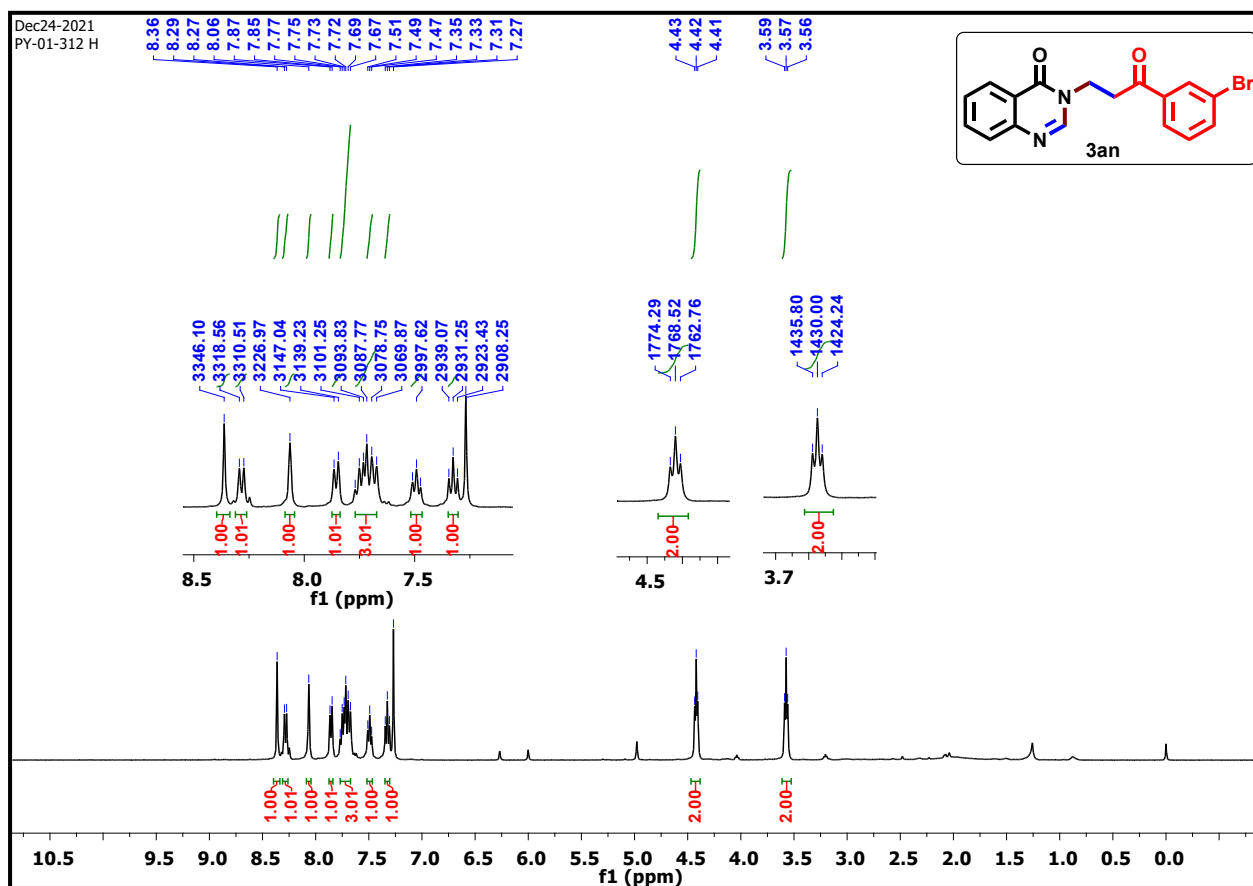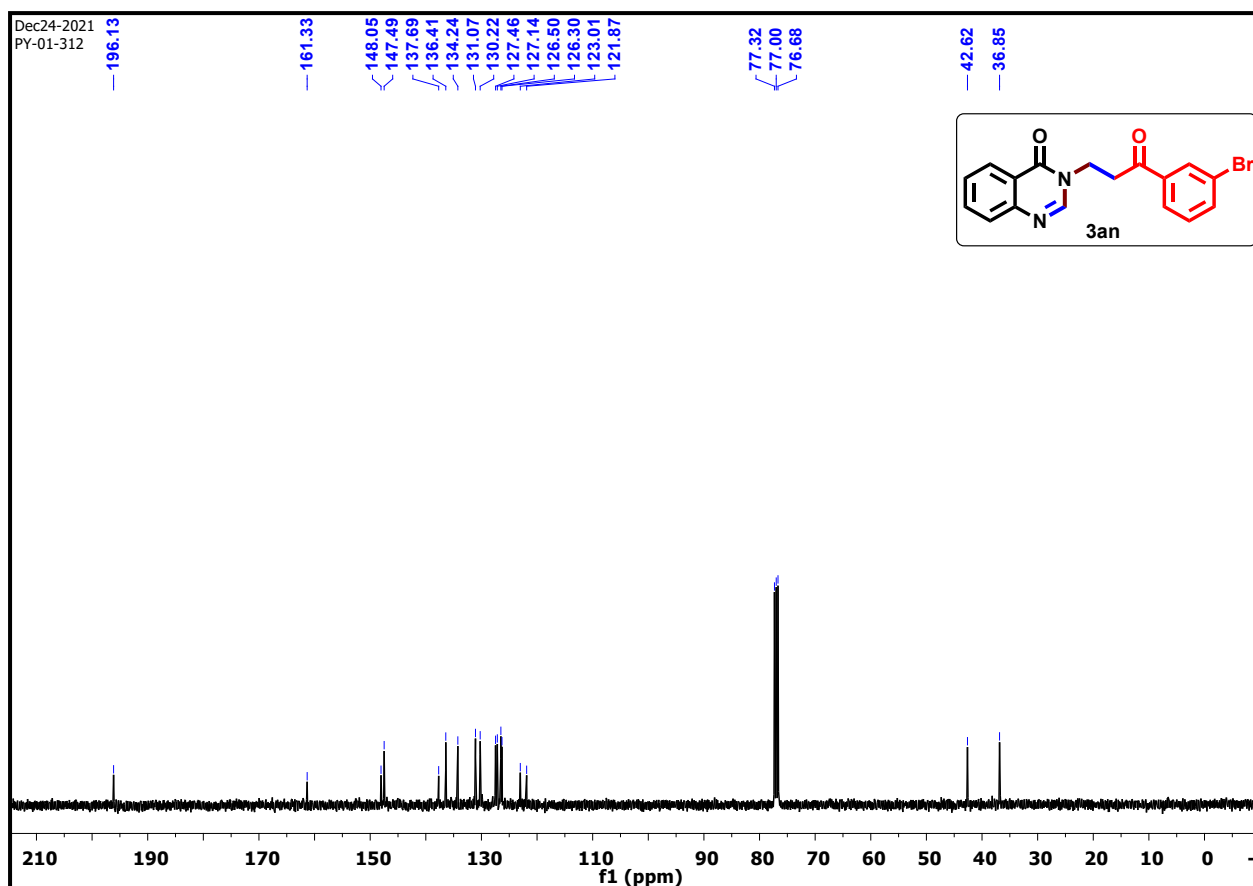



$^1\text{H}$  and  $^{13}\text{C}$  NMR spectra of **3ao** in  $\text{CDCl}_3$  400 MHz

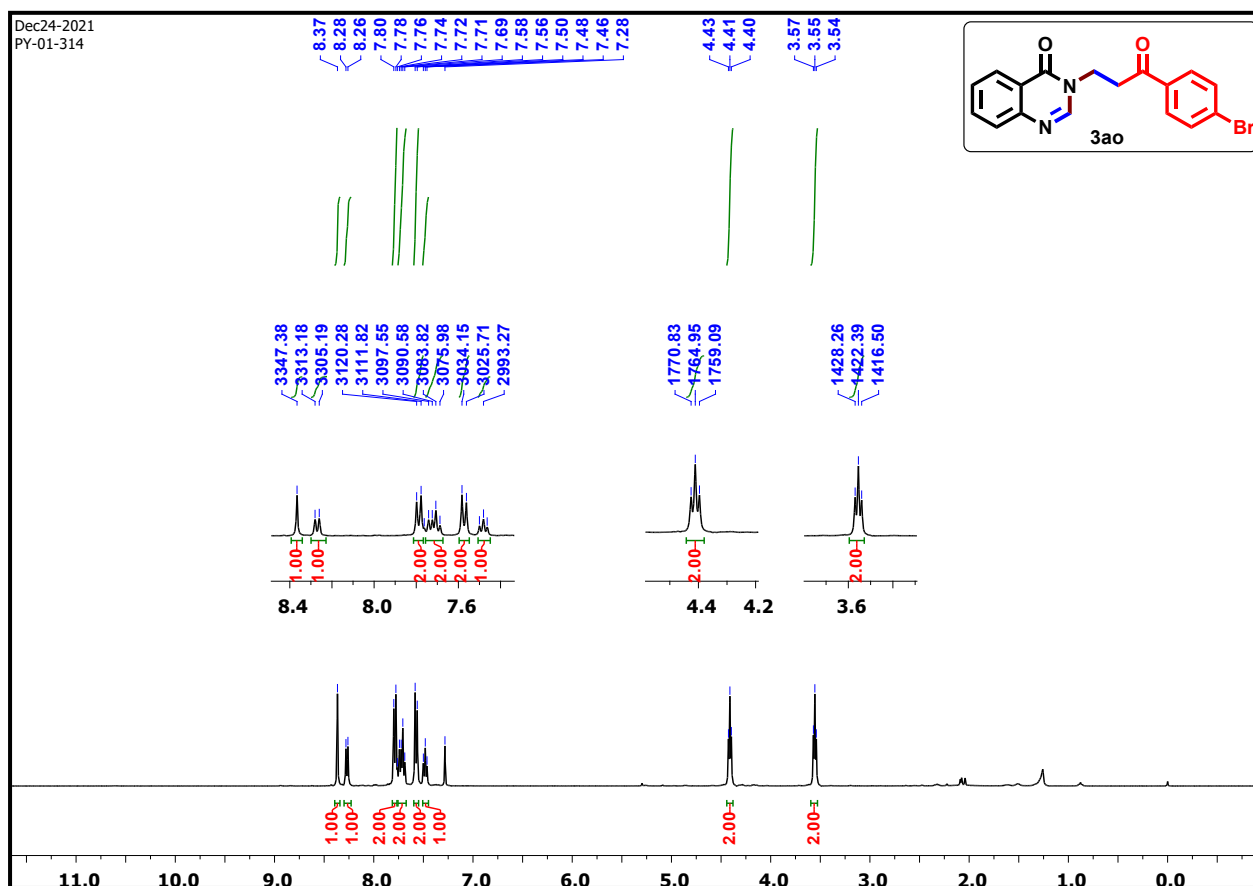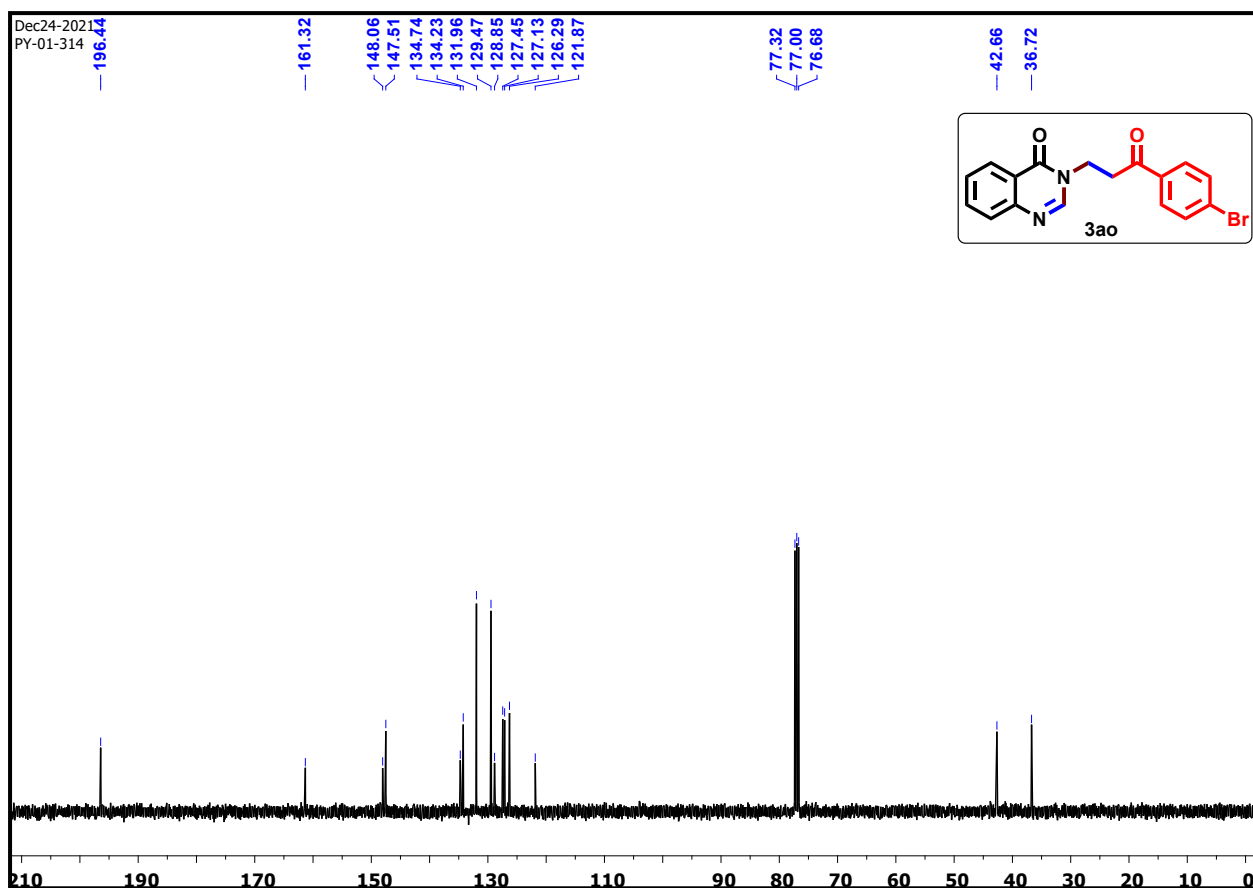

$^1\text{H}$  and  $^{13}\text{C}$  NMR spectra of **3ap** in  $\text{CDCl}_3$  400 MHz

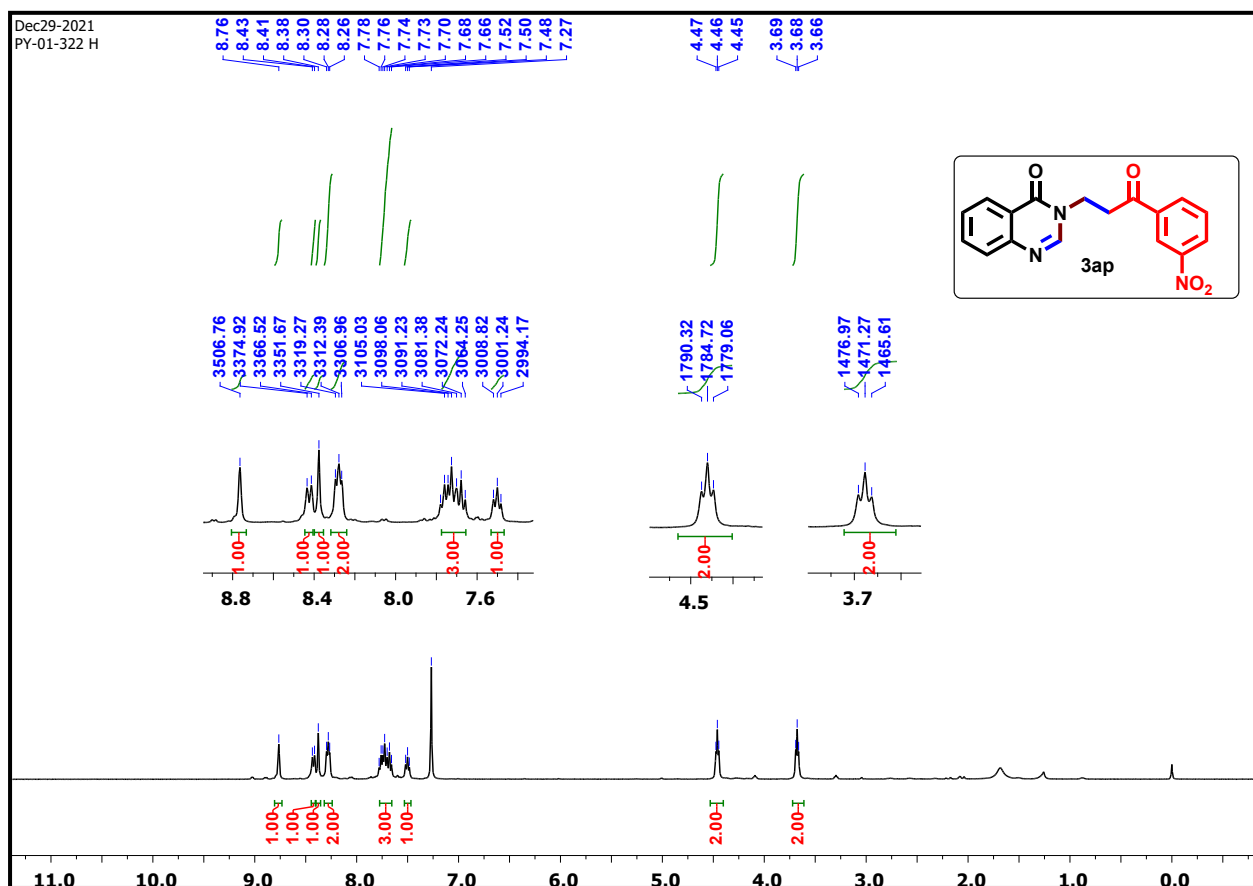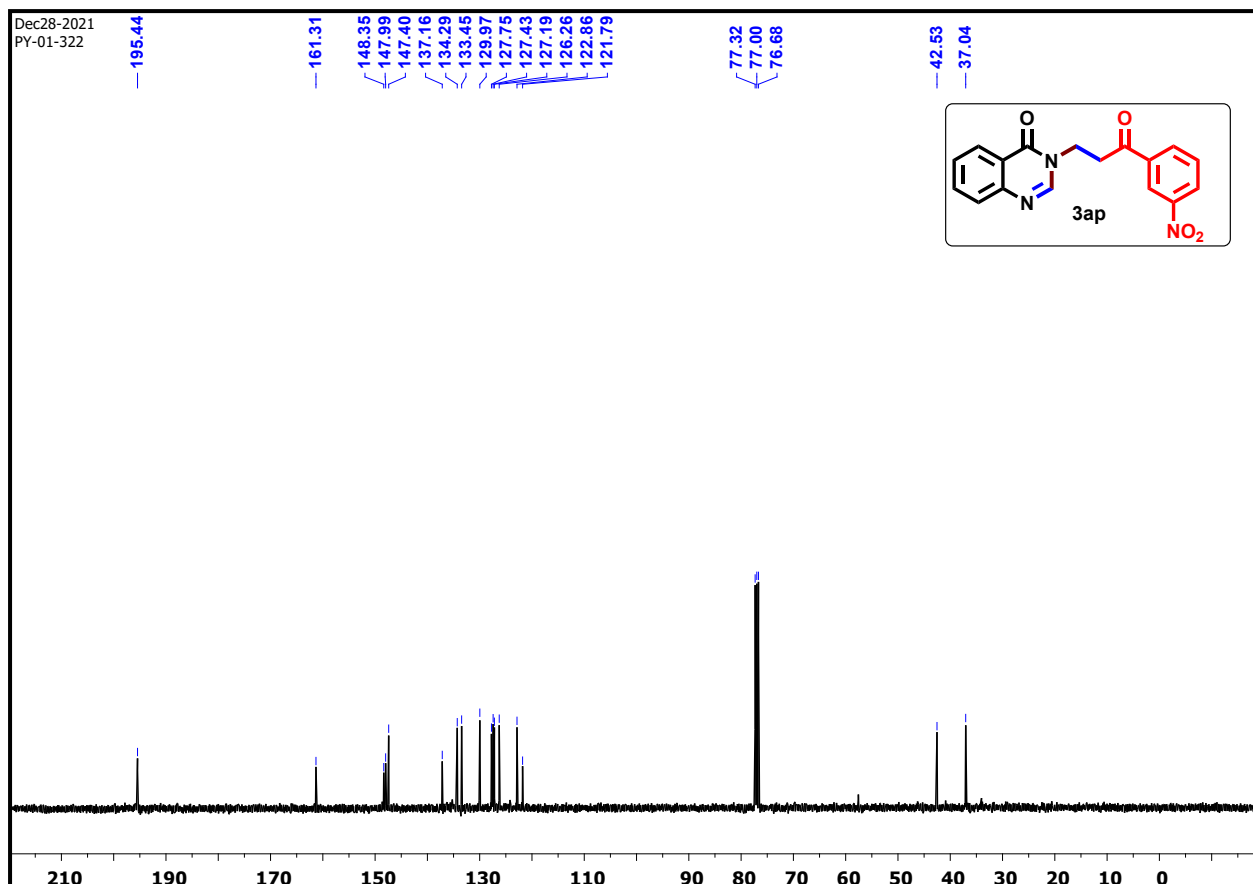



$^1\text{H}$  and  $^{13}\text{C}$  NMR spectra of **3ar** in  $\text{CDCl}_3$  400 MHz

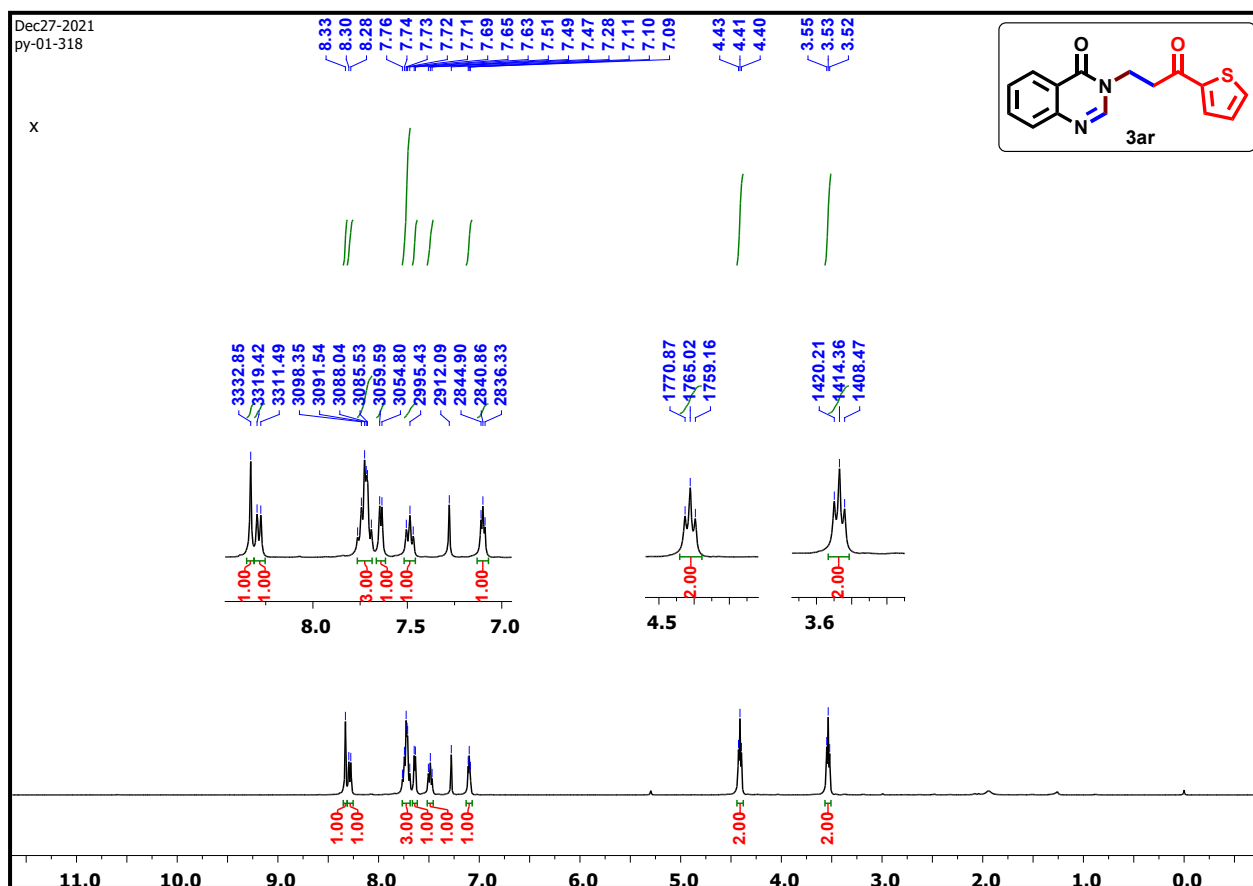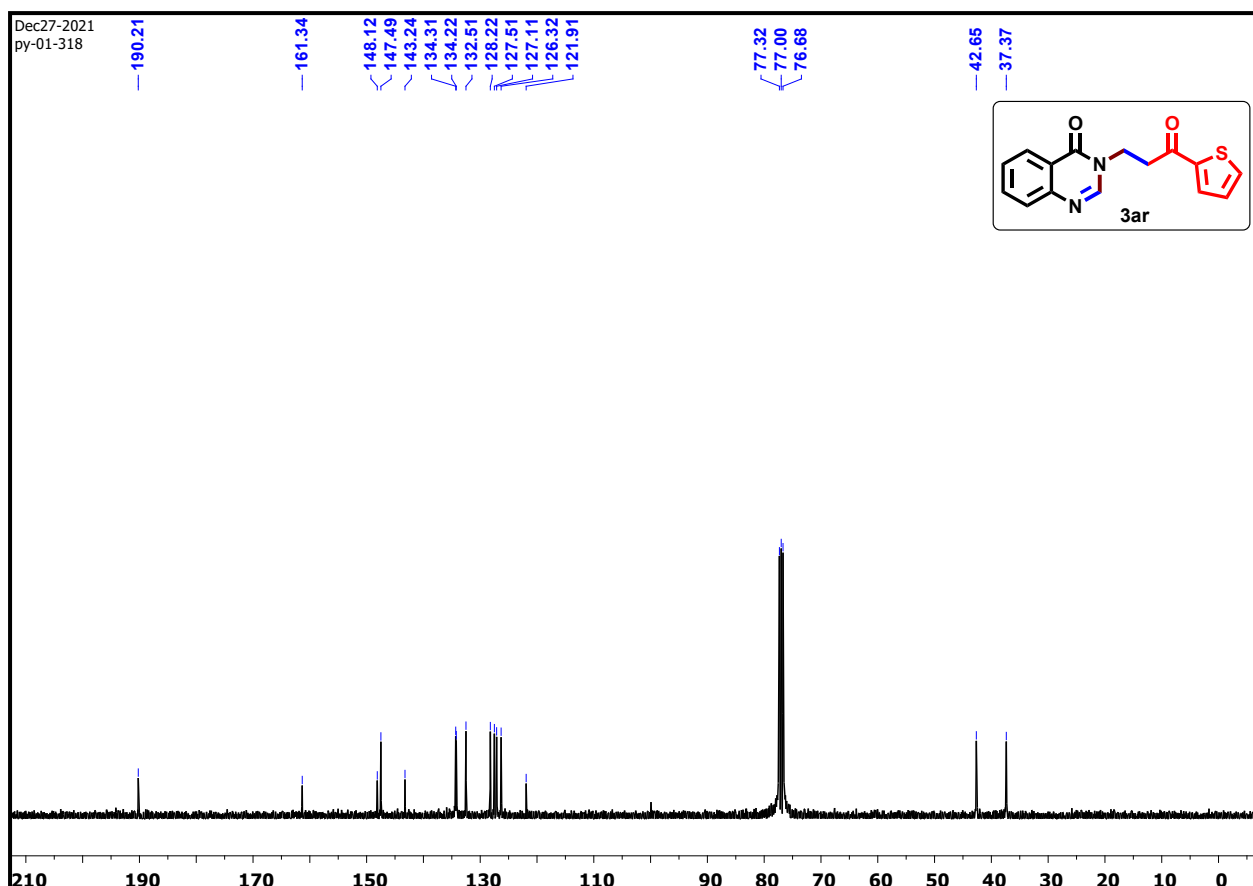

$^1\text{H}$  and  $^{13}\text{C}$  NMR spectra of **3as** in  $\text{CDCl}_3$  400 MHz

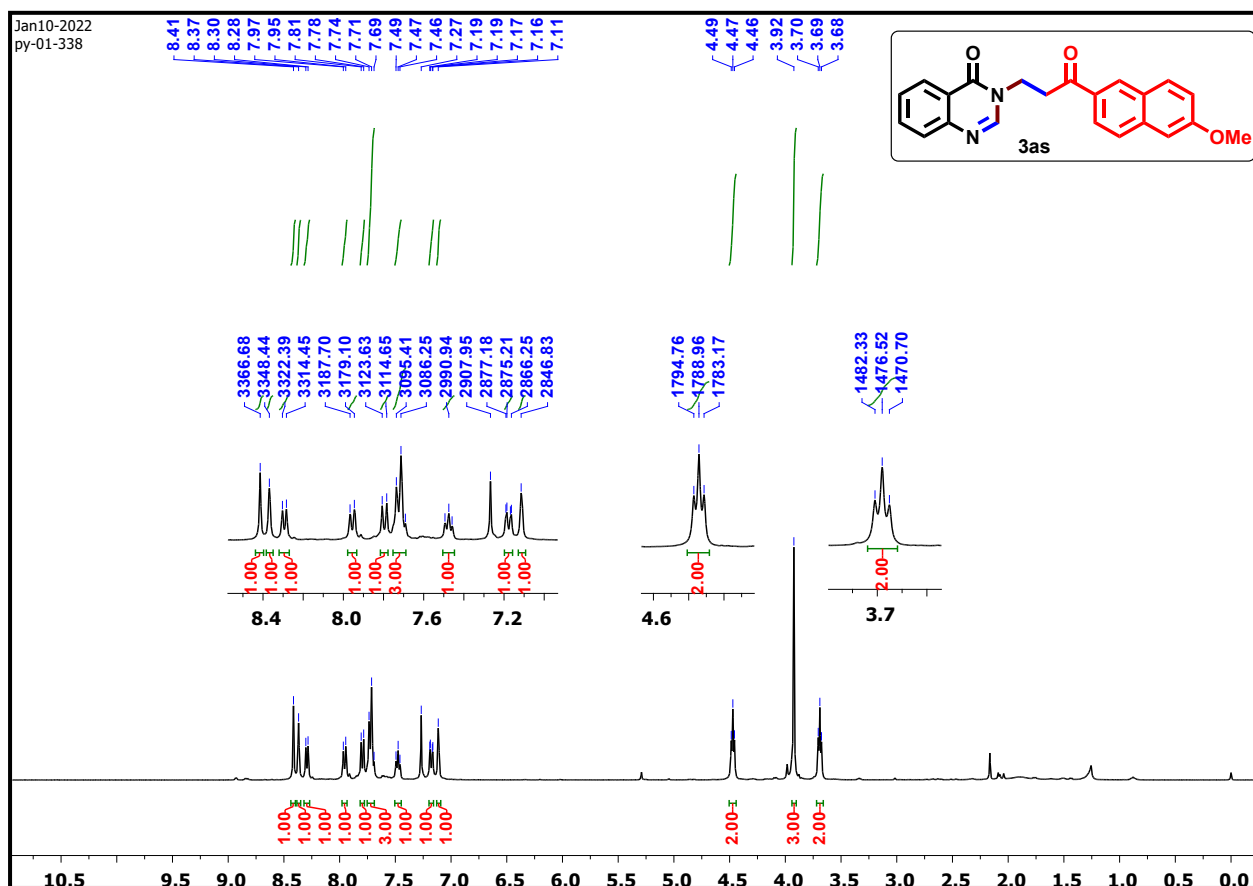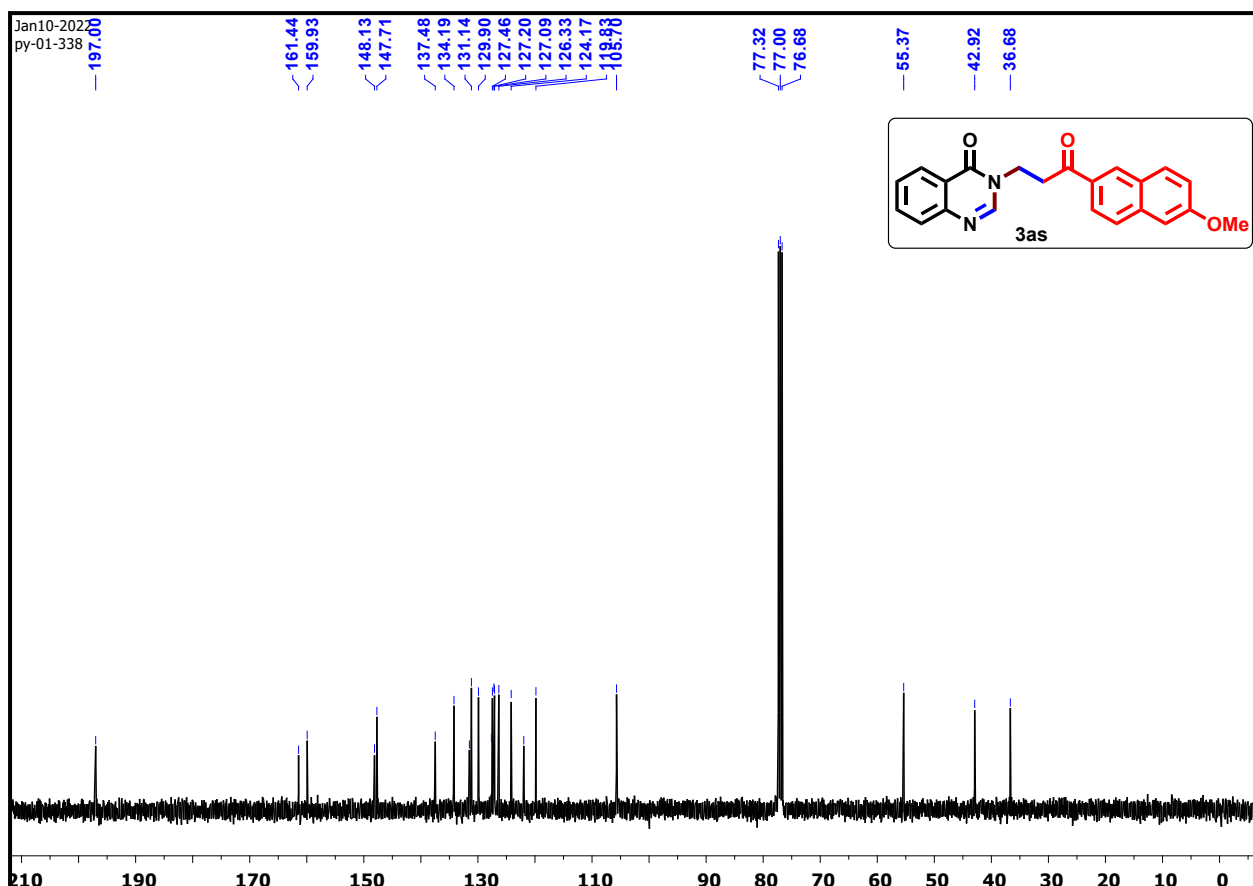

$^1\text{H}$  and  $^{13}\text{C}$  NMR spectra of **3ba** in  $\text{CDCl}_3$  400 MHz

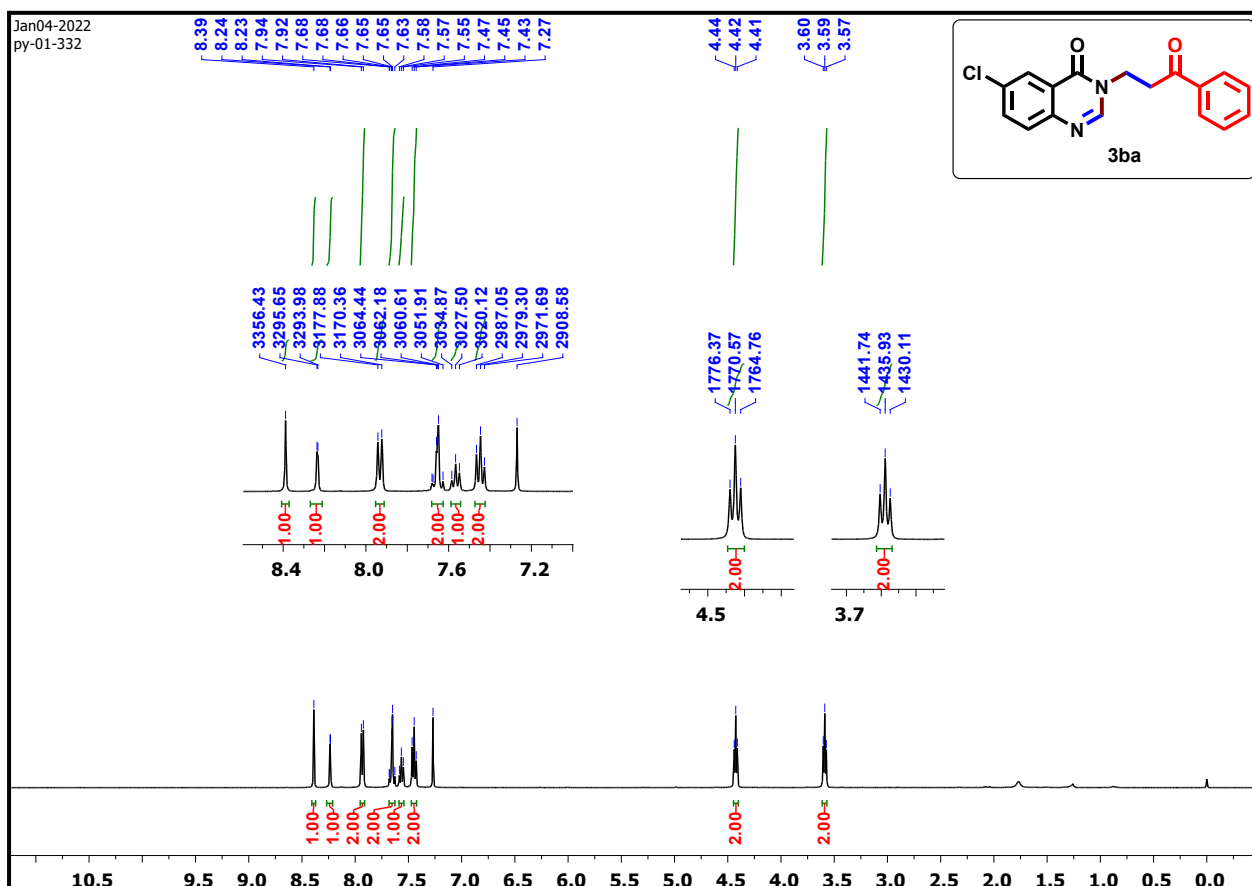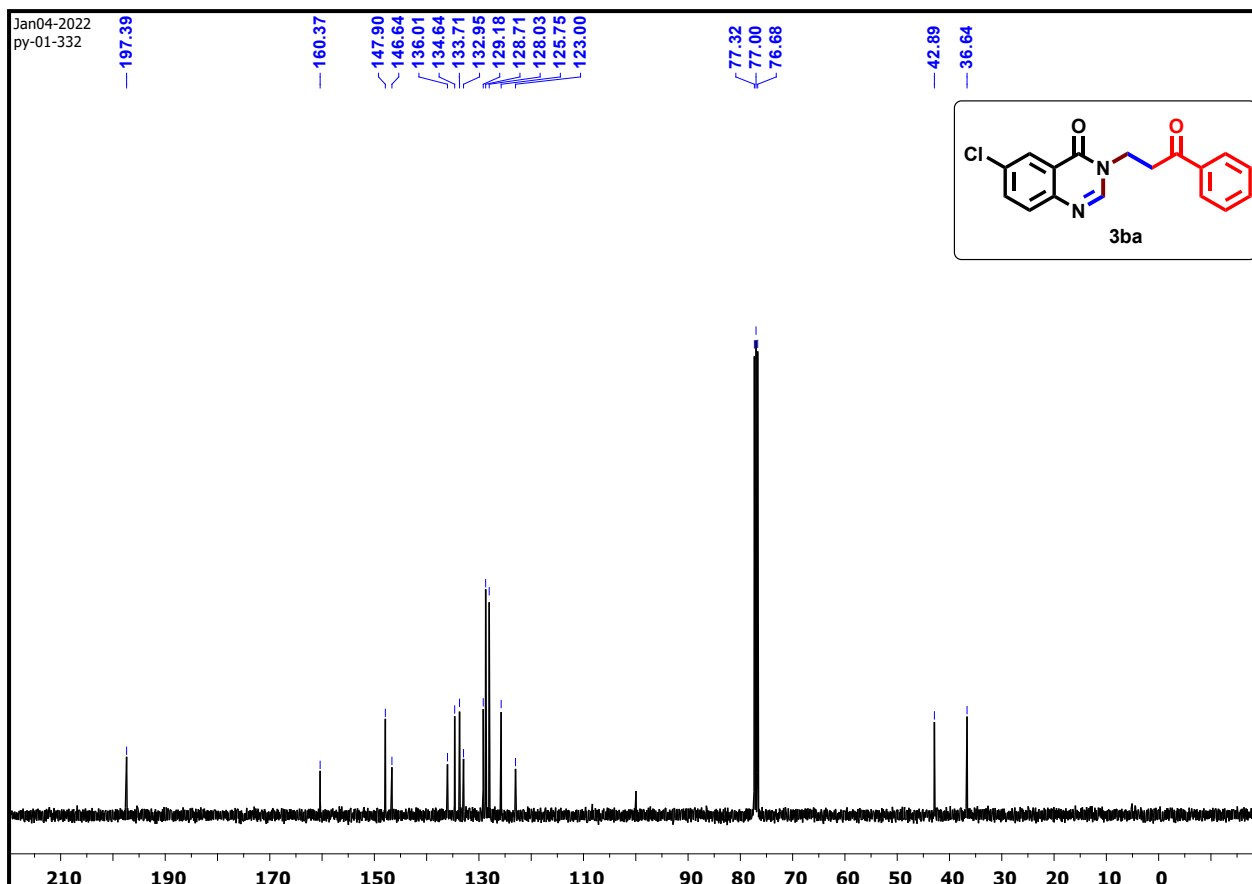

$^1\text{H}$  and  $^{13}\text{C}$  NMR spectra of **3ca** in  $\text{CDCl}_3$  400 MHz

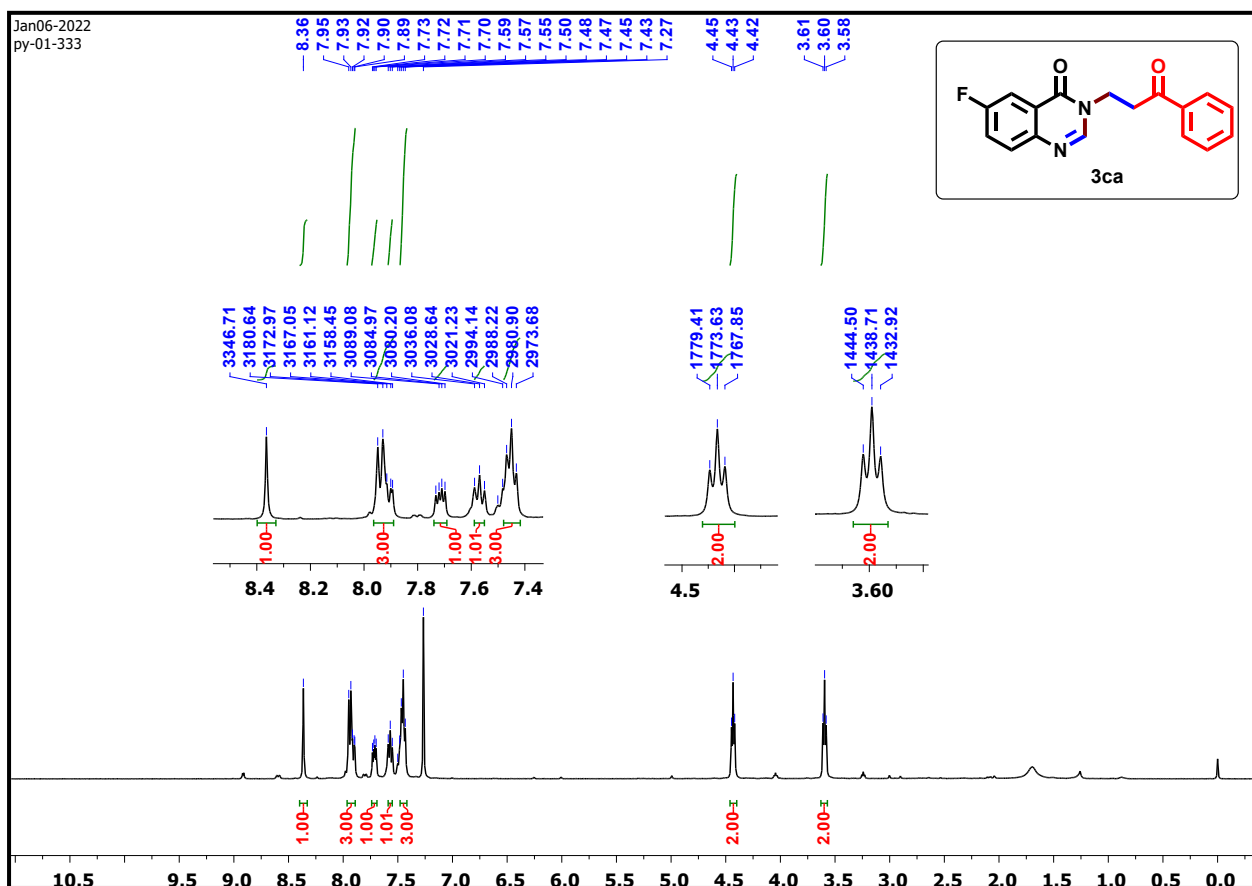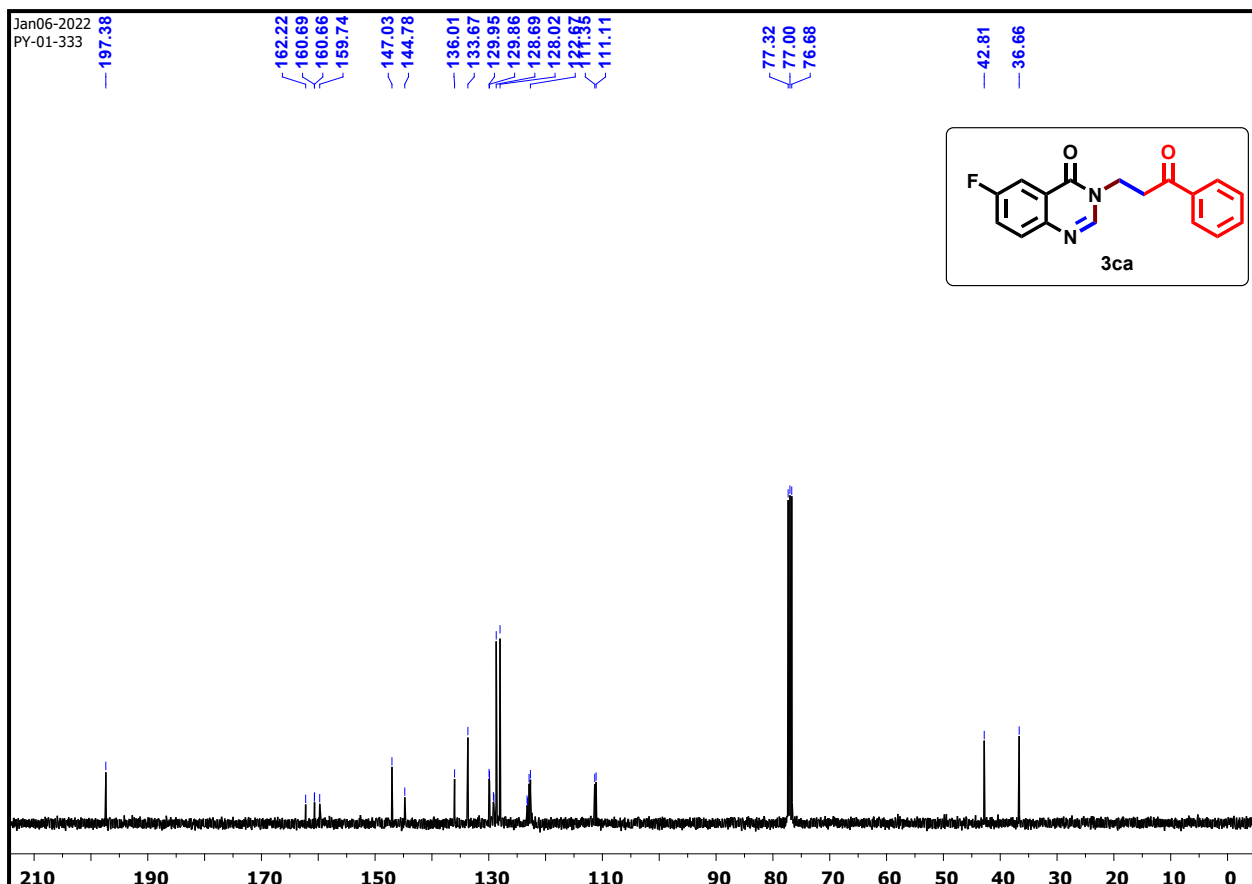

<sup>19</sup>F NMR spectra of **3ca** in CDCl<sub>3</sub>

JUN15-2022  
PY-01-333 F

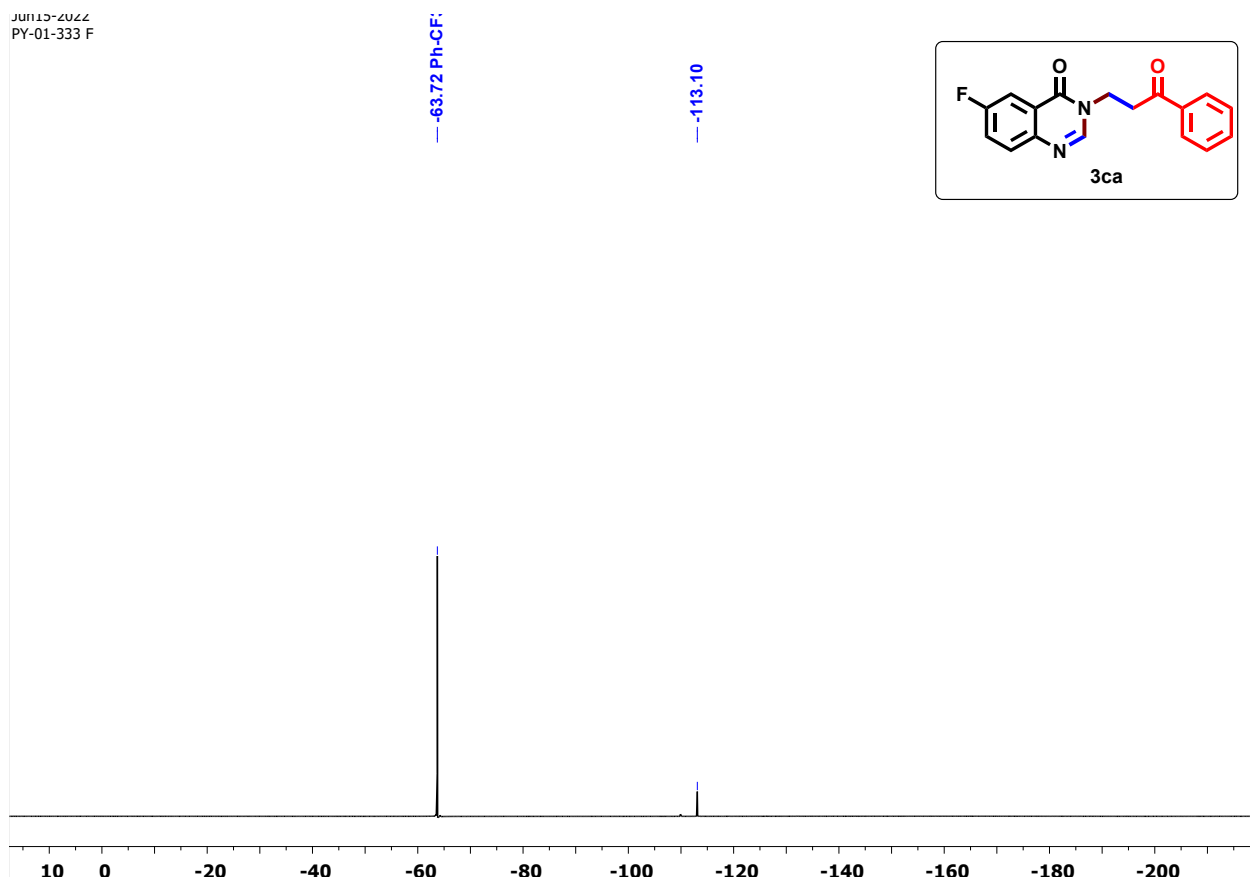



$^1\text{H}$  and  $^{13}\text{C}$  NMR spectra of **3a** in DMSO- $d_6$  at 400 MHz

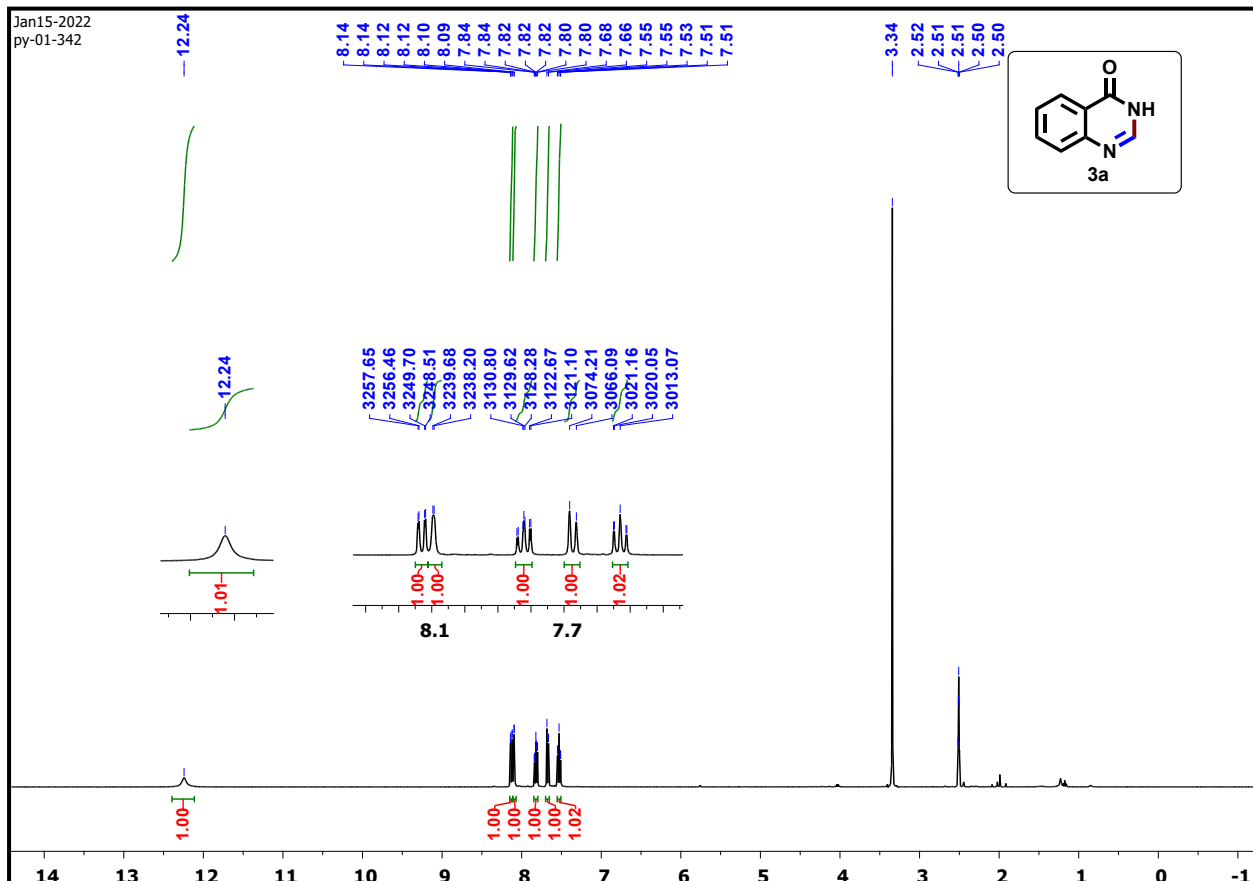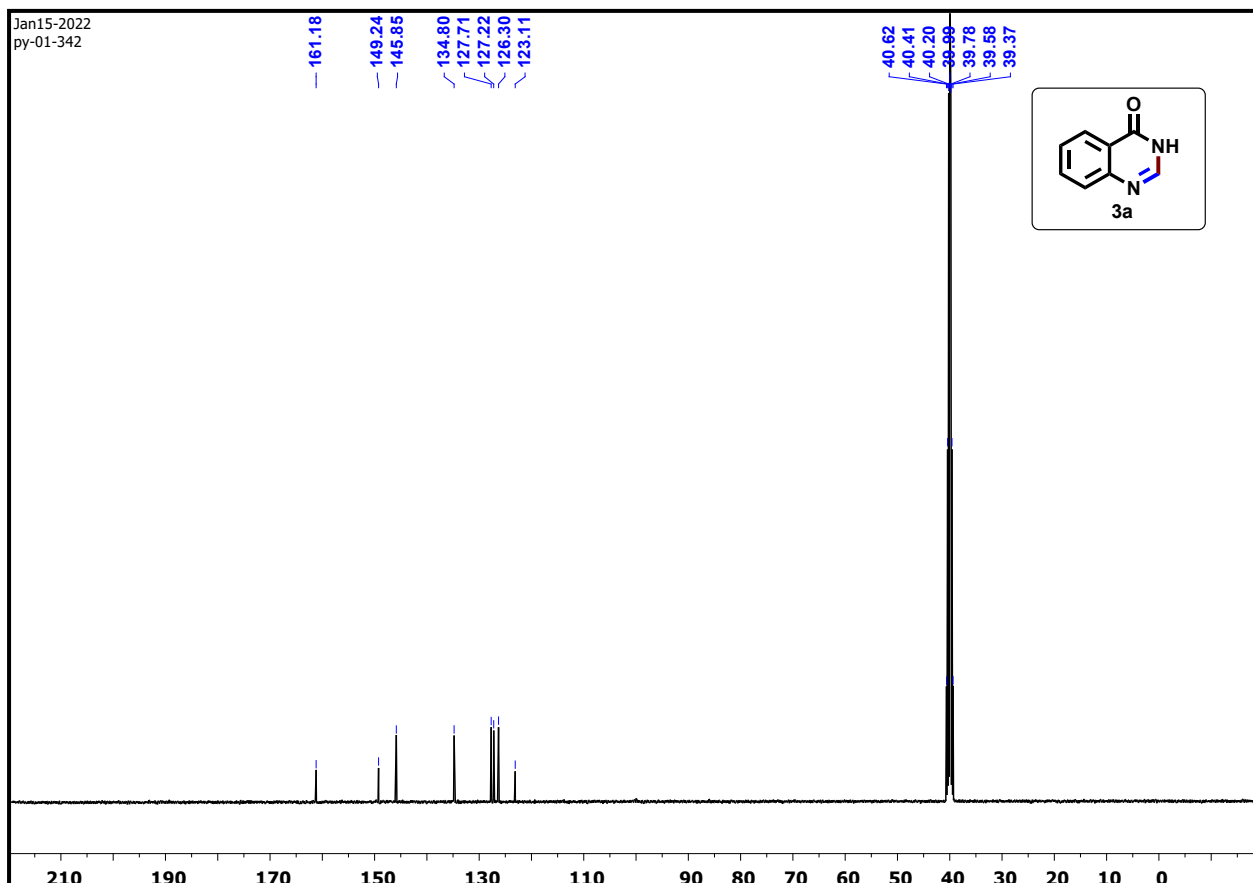

Supplement: d2nj01428a1.pdf [file d2nj01428a1.pdf]
